1 **Regulation of Store-Operated Ca<sup>2+</sup> Entry by IP<sub>3</sub> Receptors Independent of Their**  
2 **Ability to Release Ca<sup>2+</sup>**

3

4 Pragnya Chakraborty<sup>1,2</sup>, Bipan Kumar Deb<sup>1,3</sup>, Colin W. Taylor<sup>4,\*</sup> and Gaiti Hasan<sup>1,5,\*</sup>

5

6 <sup>1</sup>National Centre for Biological Sciences, Tata Institute of Fundamental Research,  
7 Bellary Road, Bangalore, 560065, India.

8 <sup>2</sup>SASTRA University, Thanjavur, Tamil Nadu, 613401, India.

9 <sup>3</sup>Present address: Department of Molecular and Cell Biology, University of California,  
10 Berkeley, CA, 94720, USA.

11 <sup>4</sup>Department of Pharmacology, University of Cambridge, Cambridge, CB2 1PD, UK.

12

13 <sup>5</sup>Lead Contact

14 \* Correspondence: [cwt1000@cam.ac.uk](mailto:cwt1000@cam.ac.uk), [gaiti@ncbs.res.in](mailto:gaiti@ncbs.res.in)

15

16

17 **ABSTRACT**

18 Loss of ER Ca<sup>2+</sup> activates store-operated Ca<sup>2+</sup> entry (SOCE) by causing STIM1 to  
19 unfurl domains that activate Orai1 channels in the plasma membrane at membrane  
20 contact sites (MCS). In human neurons, SOCE evoked by thapsigargin to deplete ER  
21 Ca<sup>2+</sup> is attenuated by loss of IP<sub>3</sub>Rs, and restored by expression of IP<sub>3</sub>Rs even when  
22 they cannot release Ca<sup>2+</sup>, but only if the IP<sub>3</sub>Rs can bind IP<sub>3</sub>. In cells expressing pore-  
23 dead IP<sub>3</sub>Rs, IP<sub>3</sub> enhances SOCE evoked by partial store depletion without enhancing  
24 Ca<sup>2+</sup> release. Proximity ligation assays establish that IP<sub>3</sub>Rs enhance association of  
25 STIM1 with Orai1 in cells with empty stores; this requires an IP<sub>3</sub>-binding site, but not a  
26 pore. Over-expressing STIM1, or extended synaptotagmin-1 to exaggerate MCS,  
27 circumvents the need for IP<sub>3</sub>Rs. Thus, IP<sub>3</sub> binding to IP<sub>3</sub>Rs stimulates SOCE by both  
28 mediating ER Ca<sup>2+</sup> release and promoting STIM1-Orai1 interactions. Convergent  
29 regulation by IP<sub>3</sub>Rs may tune SOCE to respond selectively to IP<sub>3</sub>.

30

31

32 **Keywords:** Ca<sup>2+</sup> signaling, extended synaptotagmin, human neural progenitor cell, IP<sub>3</sub>  
33 receptor, membrane contact site, neuron, Orai, proximity ligation assay, STIM, store-  
34 operated Ca<sup>2+</sup> entry

## 35 INTRODUCTION

36 The activities of all eukaryotic cells are regulated by increases in cytosolic free  $\text{Ca}^{2+}$   
37 concentration ( $[\text{Ca}^{2+}]_c$ ), which are almost invariably evoked by the opening of  $\text{Ca}^{2+}$ -  
38 permeable ion channels in biological membranes. The presence of these  $\text{Ca}^{2+}$   
39 channels within the plasma membrane (PM) and the membranes of intracellular  $\text{Ca}^{2+}$   
40 stores, most notably the endoplasmic reticulum (ER), allows cells to use both  
41 intracellular and extracellular sources of  $\text{Ca}^{2+}$  to evoke  $\text{Ca}^{2+}$  signals. In animal cells,  
42 the most widely expressed  $\text{Ca}^{2+}$  signaling sequence links extracellular stimuli, through  
43 their specific receptors and activation of phospholipase C, to formation of inositol  
44 1,4,5-trisphosphate ( $\text{IP}_3$ ), which then stimulates  $\text{Ca}^{2+}$  release from the ER through  $\text{IP}_3$   
45 receptors ( $\text{IP}_3\text{R}$ ) (Foskett *et al.*, 2007; Prole and Taylor, 2019).  $\text{IP}_3\text{Rs}$  occupy a central  
46 role in  $\text{Ca}^{2+}$  signaling by releasing  $\text{Ca}^{2+}$  from the ER.  $\text{IP}_3\text{Rs}$  thereby elicit cytosolic  
47  $\text{Ca}^{2+}$  signals, and by depleting the ER of  $\text{Ca}^{2+}$  they initiate a sequence that leads to  
48 activation of store-operated  $\text{Ca}^{2+}$  entry (SOCE) across the PM (Putney, 1986;  
49 Thillaiappan *et al.*, 2019). SOCE occurs when loss of  $\text{Ca}^{2+}$  from the ER causes  $\text{Ca}^{2+}$  to  
50 dissociate from the luminal  $\text{Ca}^{2+}$ -binding sites of an integral ER protein, stromal  
51 interaction molecule 1 (STIM1). STIM1 then unfolds its cytosolic domains to expose a  
52 region that binds directly to a  $\text{Ca}^{2+}$  channel within the PM, Orai, causing it to open and  
53  $\text{Ca}^{2+}$  to flow into the cell across the PM (Parekh and Putney, 2005; Prakriya and  
54 Lewis, 2015; Lewis, 2020). The interactions between STIM1 and Orai occur across a  
55 narrow gap between the ER and PM, a membrane contact site (MCS), where STIM1  
56 puncta trap Orai channels. While STIM1 and Orai are undoubtedly the core  
57 components of SOCE, many additional proteins modulate their interactions (Rosado,

58 Jenner and Sage, 2000; Palty *et al.*, 2012; Deb, Pathak and Hasan, 2016; Srivats *et*  
59 *al.*, 2016) and other proteins contribute by regulating the assembly of MCS (Chang *et*  
60 *al.*, 2013; Giordano *et al.*, 2013; Kang *et al.*, 2019).

61 It is accepted that IP<sub>3</sub>-evoked Ca<sup>2+</sup> release from the ER through IP<sub>3</sub>Rs is the usual  
62 means by which extracellular stimuli evoke SOCE. Here, the role of the IP<sub>3</sub>R is widely  
63 assumed to be restricted to its ability to mediate Ca<sup>2+</sup> release from the ER and thereby  
64 activate STIM1. Evidence from *Drosophila*, where we suggested an additional role for  
65 IP<sub>3</sub>Rs in regulating SOCE (Agrawal *et al.*, 2010; Chakraborty *et al.*, 2016), motivated  
66 the present study, wherein we examined the contribution of IP<sub>3</sub>Rs to SOCE in  
67 mammalian neurons. We show that in addition to their ability to activate STIM1 by  
68 evoking ER Ca<sup>2+</sup> release, IP<sub>3</sub>Rs also facilitate interactions between active STIM1 and  
69 Orai1. This additional role for IP<sub>3</sub>Rs, which is regulated by IP<sub>3</sub> but does not require a  
70 functional pore, reveals an unexpected link between IP<sub>3</sub>, IP<sub>3</sub>Rs and Ca<sup>2+</sup> signaling that  
71 is not mediated by IP<sub>3</sub>-evoked Ca<sup>2+</sup> release. We speculate that dual regulation of  
72 SOCE by IP<sub>3</sub>Rs may allow Ca<sup>2+</sup> release evoked by IP<sub>3</sub> to be preferentially coupled to  
73 SOCE.

74

## 75 **RESULTS**

### 76 **Loss of IP<sub>3</sub>R1 Attenuates SOCE in Human Neural Stem Cells and Neurons**

77 We investigated the effects of IP<sub>3</sub>Rs on SOCE by measuring [Ca<sup>2+</sup>]<sub>c</sub> in human neural  
78 stem cells and neurons prepared from embryonic stem cells. Human neural progenitor  
79 cells (hNPCs) were derived from H9 embryonic stem cells using small molecules that  
80 mimic cues provided during human brain development (Gopurappilly *et al.*, 2018). We

81 confirmed that hNPCs express canonical markers of neural stem cells (**Figure 1A**)  
82 and that IP<sub>3</sub>R1 is the predominant IP<sub>3</sub>R subtype (GEO accession no. GSE109111)  
83 (Gopurappilly *et al.*, 2018). An inducible lentiviral shRNA-miR construct targeting  
84 IP<sub>3</sub>R1 reduced IP<sub>3</sub>R1 expression by 93 ± 0.4% relative to a non-silencing (NS)  
85 construct (**Figures 1B and 1C**). Carbachol stimulates muscarinic acetylcholine  
86 receptors, which are expressed at low levels in hNPCs (Gopurappilly *et al.*, 2018). In  
87 Ca<sup>2+</sup>-free medium, carbachol evoked an increase in [Ca<sup>2+</sup>]<sub>c</sub> in about 10% of hNPCs,  
88 consistent with it stimulating Ca<sup>2+</sup> release from the ER through IP<sub>3</sub>Rs. Restoration of  
89 extracellular Ca<sup>2+</sup> then evoked an increase in [Ca<sup>2+</sup>]<sub>c</sub> in all cells that responded to  
90 carbachol. Both carbachol-evoked Ca<sup>2+</sup> release and SOCE were abolished in hNPCs  
91 expressing IP<sub>3</sub>R1-shRNA, confirming the effectiveness of the IP<sub>3</sub>R1 knockdown  
92 (**Figures S1A-S1C**).

93 Thapsigargin, a selective and irreversible inhibitor of the ER Ca<sup>2+</sup> pump  
94 (sarcoplasmic/endoplasmic reticulum Ca<sup>2+</sup>-ATPase, SERCA), was used to deplete the  
95 ER of Ca<sup>2+</sup> and thereby activate SOCE (**Figure 1D**) (Parekh and Putney, 2005).  
96 Restoration of extracellular Ca<sup>2+</sup> to thapsigargin-treated hNPCs evoked a large  
97 increase in [Ca<sup>2+</sup>]<sub>c</sub>, reflecting the activity of SOCE (**Figure 1D**). The maximal  
98 amplitude and rate of SOCE were significantly reduced in cells lacking IP<sub>3</sub>R1, but the  
99 resting [Ca<sup>2+</sup>]<sub>c</sub> and thapsigargin-evoked Ca<sup>2+</sup> release were unaffected (**Figures 1D-1F**  
100 and **Figures S1D and S1E**). STIM1 and Orai1 expression was also unaltered in  
101 hNPC lacking IP<sub>3</sub>R1 (**Figure S1G**). After spontaneous differentiation of hNPC, cells  
102 expressed markers typical of mature neurons, and the cells responded to  
103 depolarization with an increase in [Ca<sup>2+</sup>]<sub>c</sub> (**Figures S1F and S1H-S1J**). Thapsigargin

104 evoked SOCE in these differentiated neurons; and expression of IP<sub>3</sub>R1-shRNA  
105 significantly reduced the SOCE response without affecting depolarization-evoked Ca<sup>2+</sup>  
106 signals (**Figures 1H-1J** and **Figures S1H-S1L**).

107

### 108 **Loss of IP<sub>3</sub>R1 Attenuates SOCE in Human Neuroblastoma Cells**

109 IP<sub>3</sub>Rs link physiological stimuli that evoke Ca<sup>2+</sup> release from the ER to SOCE, but the  
110 contribution of IP<sub>3</sub>Rs is thought to be limited to their ability to deplete the ER of Ca<sup>2+</sup>.  
111 We have reported that in *Drosophila* neurons there is an additional requirement for  
112 IP<sub>3</sub>Rs independent of ER Ca<sup>2+</sup> release (Venkiteswaran and Hasan, 2009; Agrawal *et*  
113 *al.*, 2010; Chakraborty *et al.*, 2016). Our results with hNPCs and stem cell-derived  
114 neurons suggest a similar requirement for IP<sub>3</sub>Rs in regulating SOCE in mammalian  
115 neurons. To explore the mechanisms underlying this additional role for IP<sub>3</sub>Rs, we  
116 turned to a more tractable cell line, SH-SY5Y cells. These cells are derived from a  
117 human neuroblastoma; they exhibit many neuronal characteristics (Agholme *et al.*,  
118 2010); they express M3 muscarinic acetylcholine receptors that evoke IP<sub>3</sub>-mediated  
119 Ca<sup>2+</sup> release and SOCE (Grudt, Usowicz and Henderson, 1996); and they express  
120 predominantly IP<sub>3</sub>R1 (Wojcikiewicz, 1995; Tovey *et al.*, 2001), with detectable IP<sub>3</sub>R3,  
121 but no IP<sub>3</sub>R2 (**Figure 2A**). We used inducible expression of IP<sub>3</sub>R1-shRNA to  
122 significantly reduce IP<sub>3</sub>R1 expression (by 74 ± 1.2%), without affecting IP<sub>3</sub>R3 (**Figures**  
123 **2A and 2B**). As expected, carbachol-evoked Ca<sup>2+</sup> signals in individual SH-SY5Y cells  
124 were heterogenous and the carbachol-evoked Ca<sup>2+</sup> release was significantly reduced  
125 by knockdown of IP<sub>3</sub>R1 (**Figures 2C and 2D** and **Figures S2A and S2B**).  
126 Thapsigargin evoked SOCE in SH-SY5Y cells (Grudt, Usowicz and Henderson, 1996),

127 and it was significantly attenuated after knockdown of IP<sub>3</sub>R1 without affecting resting  
128 [Ca<sup>2+</sup>]<sub>c</sub>, the Ca<sup>2+</sup> release evoked by thapsigargin or expression of STIM1 and Orai1  
129 (**Figures 2E-2G** and **Figures S2C-S2E**). We also used CRISPR/Cas9n to disrupt one  
130 copy of the IP<sub>3</sub>R1 gene in SH-SY5Y cells with an associated decrease in IP<sub>3</sub>R1  
131 expression and attenuation of carbachol-evoked Ca<sup>2+</sup> signals (**Figures S2F-S2I**). In  
132 these cells, thapsigargin-evoked Ca<sup>2+</sup> release was minimally perturbed, but the  
133 resulting SOCE was much reduced (**Figures S2J and S2K**). These observations,  
134 which replicate those from hNPCs and neurons (**Figure 1**), vindicate our use of SH-  
135 SY5Y cells to explore the mechanisms linking IP<sub>3</sub>Rs to SOCE in human neurons.

136 Expression of IP<sub>3</sub>R1 or IP<sub>3</sub>R3 in SH-SY5Y cells expressing IP<sub>3</sub>R1-shRNA  
137 restored both carbachol-evoked Ca<sup>2+</sup> release and thapsigargin-evoked SOCE without  
138 affecting resting [Ca<sup>2+</sup>]<sub>c</sub> or thapsigargin-evoked Ca<sup>2+</sup> release (**Figures 2H-2J** and  
139 **Figures S3A-S3D**). Over-expression of STIM1 in cells expressing NS-shRNA had no  
140 effect on SOCE (**Figures S3E and S3F**), but it restored thapsigargin-evoked SOCE in  
141 cells expressing IP<sub>3</sub>R1-shRNA, without affecting resting [Ca<sup>2+</sup>]<sub>c</sub> or thapsigargin-evoked  
142 Ca<sup>2+</sup> release (**Figures 2K-2M**). We conclude that IP<sub>3</sub>Rs are required for optimal  
143 SOCE, but they are not essential because additional STIM1 can replace the need for  
144 IP<sub>3</sub>Rs (**Figure 3A**).

145 It has been reported that SOCE is unaffected by loss of IP<sub>3</sub>R in non-neuronal  
146 cells (Ma *et al.*, 2001; Chakraborty *et al.*, 2016). Consistent with these observations,  
147 the SOCE evoked in HEK 293T cells by stores emptied fully by treatment with  
148 thapsigargin was unaffected by expression of IP<sub>3</sub>R1 shRNA (**Figures S4A-S4C**) or by  
149 knockout of all three IP<sub>3</sub>R subtypes using CRISPR/cas9 (**Figures S4D and S4E**).

150 Neuronal and non-neuronal cells may, therefore, differ in the contribution of IP<sub>3</sub>R to  
151 SOCE. We return to this point later.

152

### 153 **Binding of IP<sub>3</sub> to IP<sub>3</sub>R Without a Functional Pore Stimulates SOCE**

154 IP<sub>3</sub>Rs are large tetrameric channels that open when they bind IP<sub>3</sub> and Ca<sup>2+</sup>, but they  
155 also associate with many other proteins (Prole and Taylor, 2019), and many IP<sub>3</sub>Rs  
156 within cells appear not to release Ca<sup>2+</sup> (Thillaiappan *et al.*, 2019). A point mutation  
157 (D2550A, IP<sub>3</sub>R1<sup>D/A</sup>) within the IP<sub>3</sub>R1 pore prevents it from conducting Ca<sup>2+</sup> (Dellis *et*  
158 *al.*, 2008). As expected, expression of IP<sub>3</sub>R1<sup>D/A</sup> in cells lacking IP<sub>3</sub>R1 failed to rescue  
159 carbachol-evoked Ca<sup>2+</sup> release, but it unexpectedly restored thapsigargin-evoked  
160 SOCE (**Figures 3B-3D** and **Figures S5A-S5E**). We confirmed that rescue of  
161 thapsigargin-evoked Ca<sup>2+</sup> entry by this pore-dead IP<sub>3</sub>R was mediated by a  
162 conventional SOCE pathway by demonstrating that it was substantially attenuated by  
163 siRNA-mediated knockdown of Orai1 (**Figures 3C and 3D** and **Figures S5F-S5H**).

164       Activation of IP<sub>3</sub>Rs is initiated by IP<sub>3</sub> binding to the N-terminal IP<sub>3</sub>-binding core of  
165 each IP<sub>3</sub>R subunit (Prole and Taylor, 2019). Mutation of two conserved phosphate-  
166 coordinating residues in the  $\alpha$ -domain of the binding core (R568Q and K569Q of  
167 IP<sub>3</sub>R1, IP<sub>3</sub>R1<sup>RQ/KQ</sup>) almost abolishes IP<sub>3</sub> binding (Yoshikawa *et al.*, 1996; Iwai *et al.*,  
168 2007), while mutation of a single residue (R568Q, IP<sub>3</sub>R1<sup>RQ</sup>) reduces the IP<sub>3</sub> affinity by  
169 ~10-fold (Dellis *et al.*, 2008). Expression of rat IP<sub>3</sub>R1<sup>RQ/KQ</sup> rescued neither carbachol-  
170 evoked Ca<sup>2+</sup> release nor thapsigargin-evoked SOCE in cells lacking IP<sub>3</sub>R1 (**Figures**  
171 **3E and 3F** and **Figure S5C**). However, expression of IP<sub>3</sub>R1<sup>RQ</sup> substantially rescued  
172 thapsigargin-evoked SOCE (**Figures 3E and 3F** and **Figures S5I and S5J**).



173 Expression of an N-terminal fragment of rat IP<sub>3</sub>R (IP<sub>3</sub>R1<sup>1-604</sup>), to which IP<sub>3</sub> binds  
174 normally (Iwai *et al.*, 2007), failed to rescue thapsigargin-evoked SOCE (**Figures S5K**  
175 **and S5L**). These results establish that a functional IP<sub>3</sub>-binding site within a full-length  
176 IP<sub>3</sub>R is required for IP<sub>3</sub>Rs to facilitate thapsigargin-evoked SOCE. Hence in cells with  
177 empty Ca<sup>2+</sup> stores, IP<sub>3</sub> binding, but not pore-opening, is required for regulation of  
178 SOCE by IP<sub>3</sub>Rs. In cells stimulated only with thapsigargin and expressing IP<sub>3</sub>Rs with  
179 deficient IP<sub>3</sub> binding, basal levels of IP<sub>3</sub> are probably insufficient to meet this need.

180 We further examined the need for IP<sub>3</sub> by partially depleting the ER of Ca<sup>2+</sup> using  
181 cyclopiazonic acid (CPA), a reversible inhibitor of SERCA, to allow submaximal  
182 activation of SOCE (**Figures S5M and S5N**). Under these conditions, addition of  
183 carbachol in Ca<sup>2+</sup>-free HBSS to cells expressing IP<sub>3</sub>R1-shRNA caused a small  
184 increase in [Ca<sup>2+</sup>]<sub>c</sub> (**Figures 4A-4C**). In the same cells expressing IP<sub>3</sub>R1<sup>DA</sup>, the  
185 carbachol-evoked Ca<sup>2+</sup> release was indistinguishable from that observed in cells  
186 without IP<sub>3</sub>R<sup>DA</sup> (**Figures 4B and 4C**), indicating that the small response was entirely  
187 mediated by residual native IP<sub>3</sub>R1 and/or IP<sub>3</sub>R3. Hence, the experiment allows  
188 carbachol to stimulate IP<sub>3</sub> production in cells expressing IP<sub>3</sub>R1<sup>DA</sup> without causing  
189 additional Ca<sup>2+</sup> release. The key result is that in cells expressing IP<sub>3</sub>R1<sup>DA</sup>, carbachol  
190 substantially increased SOCE (**Figures 4A-4C**). We conclude that IP<sub>3</sub>, through IP<sub>3</sub>Rs,  
191 regulates coupling of empty stores to SOCE. This is the first example of an IP<sub>3</sub>R  
192 mediating a response to IP<sub>3</sub> that does not require the pore of the channel.

193 G-protein-coupled receptors are linked to IP<sub>3</sub> formation through the G-protein  
194 Gq, which stimulates phospholipase C β (PLC β). We used YM-254890 to inhibit Gq

195 (Kostenis, Pfeil and Annala, 2020; Patt *et al.*, 2021). As expected, addition of YM-  
196 254890 to wild type (WT) or NS-shRNA transfected SH-SY5Y cells abolished the Ca<sup>2+</sup>  
197 signals evoked by carbachol, but it also reduced the maximal amplitude and rate of  
198 thapsigargin-evoked SOCE (**Figures 4D- 4E** and **Figure S5O**). YM-254890 had no  
199 effect on the residual thapsigargin-evoked SOCE in SH-SY5Y cells expressing IP<sub>3</sub>R1-  
200 shRNA (**Figure 4F** and **Figure S4O**). The latter result is important because it  
201 demonstrates that the inhibition of SOCE in cells with functional IP<sub>3</sub>Rs is not an off-  
202 target effect causing a direct inhibition of SOCE.

203 In HEK 293T cells, YM-254890 had no effect on thapsigargin-evoked SOCE, but  
204 it did inhibit SOCE in HEK 293T cells lacking IP<sub>3</sub>R1 (**Figures 4G-4I** and **Figures S6C-**  
205 **S6E**). These results suggest that in HEK 293T cells, which express all three IP<sub>3</sub>R  
206 subtypes (Mataragka & Taylor, 2018), neither loss of IP<sub>3</sub>R1 nor inhibition of Gαq is  
207 sufficient on its own to inhibit thapsigargin-evoked SOCE, but when combined there is  
208 a synergistic loss of SOCE.

209

### 210 **IP<sub>3</sub>Rs Promote Interaction of STIM1 With Orai1 Within MCS**

211 Our evidence that IP<sub>3</sub>Rs intercept coupling between empty stores and SOCE (**Figure**  
212 **3A**) prompted us to investigate the coupling of STIM1 with Orai1 across the narrow  
213 junctions between ER and PM (Carrasco and Meyer, 2011). An *in situ* proximity  
214 ligation assay (PLA) is well suited to analyzing this interaction because it provides a  
215 signal when two immunolabelled proteins are within ~40 nm of each other (Derangère  
216 *et al.*, 2016), a distance comparable to the dimensions of the junctions wherein STIM1  
217 and Orai1 interact (Poteser *et al.*, 2016). We confirmed the specificity of the PLA and

218 demonstrated that it reports increased association of STIM1 with Orai1 after treating  
219 SH-SY5Y cells with thapsigargin (**Figure 5A** and **Figures S7A-S7F**). In cells  
220 expressing IP<sub>3</sub>R1-shRNA, thapsigargin had no effect on the STIM1-Orai1 interaction  
221 reported by PLA, but the interaction was rescued by expression of IP<sub>3</sub>R1 or IP<sub>3</sub>R1<sup>DA</sup>.  
222 There was no rescue with IP<sub>3</sub>R1<sup>RQ/KQ</sup> (**Figures 5B-5E**). The results with PLA exactly  
223 mirror those from functional analyses (**Figures 1** and **2**), suggesting that IP<sub>3</sub> binding to  
224 IP<sub>3</sub>R enhances SOCE by facilitating interaction of STIM1 with Orai1 (**Figure 3A**).

225 Extended synaptotagmins (E-Syts) are ER proteins that stabilize ER-PM  
226 junctions including STIM1-Orai1 MCS (Maléth *et al.*, 2014; Kang *et al.*, 2019; Woo *et*  
227 *al.*, 2020). Over-expression of E-Syt1 in SH-SY5Y cells expressing IP<sub>3</sub>R1-shRNA  
228 rescued thapsigargin-evoked Ca<sup>2+</sup> entry without affecting resting [Ca<sup>2+</sup>]<sub>c</sub> or  
229 thapsigargin-evoked Ca<sup>2+</sup> release (**Figures 6A-6C**). The rescued Ca<sup>2+</sup> entry is likely to  
230 be mediated by conventional SOCE because it was substantially attenuated by  
231 knockdown of STIM1 (**Figures 6D-6F**). Over-expression of E-Syt1 had no effect on  
232 SOCE in cells with unperturbed IP<sub>3</sub>Rs (**Figures 6G-6I**). These results suggest that  
233 attenuated SOCE after loss of IP<sub>3</sub>Rs can be restored by exaggerating ER-PM MCS.

234

## 235 **DISCUSSION**

236 After identification of STIM1 and Orai1 as core components of SOCE (Prakriya and  
237 Lewis, 2015; Thillaiappan *et al.*, 2019), the sole role of IP<sub>3</sub>Rs within the SOCE  
238 pathway was assumed to be the release of ER Ca<sup>2+</sup> that triggers STIM1 activation.  
239 The assumption is consistent with evidence that thapsigargin-evoked SOCE can occur  
240 in avian (Sugawara *et al.*, 1997; Ma *et al.*, 2002; Chakraborty *et al.*, 2016) and

241 mammalian cells without IP<sub>3</sub>Rs (Prakriya and Lewis, 2001). Although SOCE in  
242 mammalian HEK 293T was unaffected by loss of IP<sub>3</sub>Rs in our study (**Figure 4G and**  
243 **4I**), it was modestly reduced in other studies of mammalian cells (Bartok *et al.*, 2019;  
244 Yue *et al.*, 2020). However, additional complexity is suggested by evidence that  
245 SOCE may be reduced in cells without IP<sub>3</sub>Rs (Chakraborty *et al.*, 2016; Bartok *et al.*,  
246 2019; Yue *et al.*, 2020), by observations implicating phospholipase C in SOCE  
247 regulation (Rosado, Jenner and Sage, 2000; Broad *et al.*, 2001), by evidence that  
248 SOCE responds differently to IP<sub>3</sub>Rs activated by different synthetic ligands (Parekh,  
249 Riley and Potter, 2002) and by some, albeit conflicting reports (Ahmad *et al.*, 2022),  
250 that IP<sub>3</sub>Rs may interact with STIM and/or Orai (Woodard *et al.*, 2010; Santoso,  
251 Cebotaru and Guggino, 2011; Béliveau, Lessard and Guillemette, 2014; Sampieri *et*  
252 *al.*, 2018).

253 We identified two roles for IP<sub>3</sub>Rs in controlling endogenous SOCE in human  
254 neurons. As widely reported, IP<sub>3</sub>Rs activate STIM1 by releasing Ca<sup>2+</sup> from the ER, but  
255 they also, and independent of their ability to release Ca<sup>2+</sup>, enhance interactions  
256 between active STIM1 and Orai1 (**Figure 7**). The second role for IP<sub>3</sub>Rs can be  
257 supplanted by over-expressing other components of the SOCE complex, notably  
258 STIM1 or ESyt1 (**Figures 2K-2M** and **Figures 6A and 6B**). It is intriguing that STIM1  
259 (Carrasco and Meyer, 2011; Lewis, 2020), ESyt1 (Giordano *et al.*, 2013) and perhaps  
260 IP<sub>3</sub>Rs (through the IP<sub>3</sub>-binding core) interact with phosphatidylinositol 4,5-  
261 bisphosphate (PIP<sub>2</sub>), which is dynamically associated with SOCE-MCS (Kang *et al.*,  
262 2019). We suggest that the extent to which IP<sub>3</sub>Rs tune SOCE in different cells is  
263 probably determined by the strength of Gq signaling and endogenous interactions

264 between STIM1 and Orai1. The latter is likely to depend on the relative expression of  
265 STIM1 and Orai1 (Woo *et al.*, 2020), the STIM isoforms expressed, expression of  
266 proteins that stabilize STIM1-Orai1 interactions (Darbellay *et al.*, 2011; Rana *et al.*,  
267 2015; Rosado *et al.*, 2016; Knapp *et al.*, 2020), and the size and number of the MCS  
268 where STIM1 and Orai1 interact (Kang *et al.*, 2019). The multifarious contributors to  
269 SOCE suggest that cells may differ in whether they express “spare capacity”. In  
270 neuronal cells, loss of IP<sub>3</sub> (**Figure 4D**) or of the dominant IP<sub>3</sub>R isoform (IP<sub>3</sub>R1-shRNA;  
271 **Figures 1 and 2**) is sufficient to unveil the contribution of IP<sub>3</sub>R to SOCE, whereas  
272 HEK 293T cells require loss of both IP<sub>3</sub> and IP<sub>3</sub>R1 to unveil the contribution (**Figures**  
273 **4H and 4I**). The persistence of SOCE in cells devoid of IP<sub>3</sub>Rs (**Figures S4D and S4E**)  
274 (Prakriya and Lewis, 2001; Ma *et al.*, 2002) probably arises from adaptive changes  
275 within the SOCE pathway. This does not detract from our conclusion that under  
276 physiological conditions, where receptors through IP<sub>3</sub> initiate SOCE, IP<sub>3</sub>Rs actively  
277 regulate SOCE.

278 The IP<sub>3</sub>Rs that initiate Ca<sup>2+</sup> signals reside in ER immediately beneath the PM and  
279 alongside, but not within, the MCS where STIM1 accumulates after store depletion  
280 (Thillaiappan *et al.*, 2017). In migrating cells too, IP<sub>3</sub>Rs and STIM1 remain separated  
281 as they redistribute to the leading edge (Okeke *et al.*, 2016). Furthermore, there is  
282 evidence that neither STIM1 nor STIM2 co-immunoprecipitate with IP<sub>3</sub>R1 (Ahmad *et*  
283 *al.*, 2022). We suggest, and consistent with evidence that SOCE in cells without IP<sub>3</sub>Rs  
284 can be restored by over-expressing E-Syt1 (**Figures 6A-6C**), that IP<sub>3</sub>Rs probably  
285 facilitate SOCE by stabilizing the MCS wherein STIM1 and Orai1 interact, rather than  
286 by directly regulating either protein. This proposal provides an analogy with similar

287 structural roles for IP<sub>3</sub>Rs in maintaining MCS between ER and mitochondria (Bartok *et*  
288 *al.*, 2019) or lysosomes (Atakpa *et al.*, 2018) (**Figure 7**). Since both contributions of  
289 IP<sub>3</sub>Rs to SOCE require IP<sub>3</sub> binding (**Figures 3E and 3F**), each is ultimately controlled  
290 by receptors that stimulate IP<sub>3</sub> formation (**Figures 4B and 4C**). Convergent regulation  
291 by IP<sub>3</sub>Rs at two steps in the SOCE pathway may ensure that receptor-regulated PLC  
292 activity provides the most effective stimulus for SOCE; more effective, for example,  
293 than ryanodine receptors, which are also expressed in neurons. By opening IP<sub>3</sub>Rs  
294 parked alongside SOCE MCS (Thillaiappan *et al.*, 2017; Ahmad *et al.*, 2022), IP<sub>3</sub>  
295 selectively releases Ca<sup>2+</sup> from ER that is optimally placed to stimulate SOCE, and by  
296 facilitating Orai1-STIM1 interactions IP<sub>3</sub> reinforces this local activation of SOCE  
297 (**Figure 7**).

298 We conclude that IP<sub>3</sub>-regulated IP<sub>3</sub>Rs regulate SOCE by mediating Ca<sup>2+</sup> release  
299 from the ER, thereby activating STIM1 and/or STIM2 (Ahmad *et al.*, 2022) and,  
300 independent of their ability to release Ca<sup>2+</sup>, IP<sub>3</sub>Rs facilitate the interactions between  
301 STIM and Orai that activate SOCE. Dual regulation of SOCE by IP<sub>3</sub> and IP<sub>3</sub>Rs allows  
302 robust control by cell-surface receptors and may reinforce local stimulation of Ca<sup>2+</sup>  
303 entry.

304

## 305 **ACKNOWLEDGEMENTS**

306 This research was supported by grants to G.H. from the Dept. of Biotechnology, Govt.  
307 of India (BT/PR6371/COE/34/19/2013) and NCBS-TIFR core support, and to C.W.T.  
308 from the Wellcome Trust (101844) and Biotechnology and Biological Sciences  
309 Research Council (BB/T012986/1). P.C is supported by a DST-INSPIRE fellowship

310 (DST/INSPIRE Fellowship/2017/IF170360) and she received an Infosys-NCBS travel  
311 award to visit C.W.T.'s lab at Cambridge. We are grateful to Renjitha Gopurappilly  
312 (NCBS, TIFR) for the derivation of human neural precursor cells. We acknowledge  
313 use of the Central Imaging and Flow Cytometry Facility (CIFF), Stem Cell Culture  
314 Facility and Biosafety level-2 laboratory facility at NCBS, TIFR.

315

### 316 **AUTHOR CONTRIBUTIONS**

317 P.C. and B.K.D performed the experiments and analysed the data. P.C., G.H. and  
318 C.W.T. conceptualized the experiments and wrote the manuscript.

319

### 320 **DECLARATION OF INTERESTS**

321 The authors declare no competing interests.

322

### 323 **REFERENCES**

324 Agholme, L., Lindström, T., Kågedal, K., Marcusson, J. and Hallbeck, M. 2010. An in  
325 vitro model for neuroscience: differentiation of SH-SY5Y cells into cells with  
326 morphological and biochemical characteristics of mature neurons. *J. Alzheimer's*  
327 *Dis.* 20:1069–1082.

328 Agrawal, N., Venkiteswaran, G., Sadaf, S., Padmanabhan, N., Banerjee, S. and  
329 Hasan, G. 2010. Inositol 1, 4, 5-trisphosphate receptor and dSTIM function in  
330 *Drosophila* insulin-producing neurons regulates systemic intracellular calcium  
331 homeostasis and flight. *J. Neurosci.* 30:1301-1313.

332 Ahmad, M. et al. 2022. Functional communication between IP<sub>3</sub>R and STIM2 at

- 333 subthreshold stimuli is a critical checkpoint for initiation of SOCE. *Proc. Natl.*  
334 *Acad. Sci.* 119: e2114928118.
- 335 Atakpa, P., Thillaiappan, N.B., Mataragka, S., Prole, D.L. and Taylor, C.W. 2018. IP<sub>3</sub>  
336 receptors preferentially associate with ER-lysosome contact sites and selectively  
337 deliver Ca<sup>2+</sup> to lysosomes. *Cell Rep.* 25:3180-3193.
- 338 Auyeung, V.C., Ulitsky, I., McGeary, S.E. and Bartel, D.P. 2013. Beyond secondary  
339 structure: primary-sequence determinants license pri-miRNA hairpins for  
340 processing. *Cell.* 152:844-858.
- 341 Bartok, A., Weaver, D., Golenár, T., Nichtova, Z., Katona, M., Bánsághi, S., Alzayady,  
342 K.J., Thomas, V.K., Ando, H., Mikoshiba, K. and Joseph, S.K. 2019. IP<sub>3</sub> receptor  
343 isoforms differently regulate ER-mitochondrial contacts and local calcium  
344 transfer. *Nat. Commun.* 10:1-14.
- 345 Béliveau, É., Lessard, V. and Guillemette, G. 2014. STIM1 positively regulates the  
346 Ca<sup>2+</sup> release activity of the inositol 1,4,5-trisphosphate receptor in bovine aortic  
347 endothelial cells. *PLoS One.* 9: e114718.
- 348 Broad, L.M., Braun, F.J., Lievremont, J.P., Bird, G.S.J., Kurosaki, T. and Putney Jr,  
349 J.W. 2001. Role of the phospholipase C-inositol 1, 4, 5-trisphosphate pathway in  
350 calcium release-activated calcium current and capacitative calcium entry. *J. Biol.*  
351 *Chem.* 276:15945–15952.
- 352 Carrasco, S. and Meyer, T. 2011. STIM proteins and the endoplasmic reticulum-  
353 plasma membrane junctions. *Annu. Rev. Biochem.* 80:973–1000.
- 354 Chakraborty, S., Deb, B.K., Chorna, T., Konieczny, V., Taylor, C.W. and Hasan, G.  
355 2016. Mutant IP<sub>3</sub> receptors attenuate store-operated Ca<sup>2+</sup> entry by destabilizing



- 356 STIM–Orai interactions in *Drosophila* neurons. *J. Cell Sci.* 129:3903–3910.
- 357 Chang, C.L., Hsieh, T.S., Yang, T.T., Rothberg, K.G., Azizoglu, D.B., Volk, E., Liao,  
358 J.C. and Liou, J. 2013. Feedback regulation of receptor-induced Ca<sup>2+</sup> signaling  
359 mediated by E-Syt1 and Nir2 at endoplasmic reticulum-plasma membrane  
360 junctions. *Cell Rep.* 5:813–825.
- 361 Darbellay, B., Arnaudeau, S., Bader, C.R., Konig, S. and Bernheim, L. 2011. STIM1L  
362 is a new actin-binding splice variant involved in fast repetitive Ca<sup>2+</sup> release. *J.*  
363 *Cell Biol.* 194:335-346.
- 364 Deb, B. K., Pathak, T. and Hasan, G. 2016. Store-independent modulation of Ca<sup>2+</sup>  
365 entry through Orai by Septin 7. *Nat. Commun.* 7:1-15.
- 366 Dellis, O., Rossi, A.M., Dedos, S.G. and Taylor, C.W. 2008. Counting functional  
367 inositol 1, 4, 5-trisphosphate receptors into the plasma membrane. *J Biol. Chem.*  
368 283:751-755.
- 369 Derangère, V., Bruchard, M., Végran, F. and Ghiringhelli, F. 2016. Proximity Ligation  
370 Assay (PLA) protocol using Duolink® for T cells. *Bio-protocol.* 6:e1811.
- 371 Forostyak, O., Romanyuk, N., Verkhatsky, A., Sykova, E. and Dayanithi, G. 2013.  
372 Plasticity of calcium signaling cascades in human embryonic stem cell-derived  
373 neural precursors. *Stem Cells Dev.* 22:1506-1521.
- 374 Foskett, J.K., White, C., Cheung, K.H. and Mak, D.O.D. 2007. Inositol trisphosphate  
375 receptor Ca<sup>2+</sup> release channels. *Physiol. Rev.* 87:593–658.
- 376 Giordano, F., Saheki, Y., Idevall-Hagren, O., Colombo, S.F., Pirruccello, M., Milosevic,  
377 I., Gracheva, E.O., Bagriantsev, S.N., Borgese, N. and De Camilli, P. 2013. PI(4,  
378 5) P<sub>2</sub>-dependent and Ca<sup>2+</sup>-regulated ER-PM interactions mediated by the

379 extended synaptotagmins. *Cell*. 153:1494-1509.

380 Gopurappilly, R., Deb, B.K., Chakraborty, P. and Hasan, G. 2018. Stable STIM1  
381 knockdown in self-renewing human neural precursors promotes premature  
382 neural differentiation. *Front. Mol. Neurosci.* 11:178.

383 Gopurappilly, R., Deb, B.K., Chakraborty, P. and Hasan, G. 2019. Measurement of  
384 store-operated calcium entry in human neural cells: From precursors to  
385 differentiated neurons. *Methods Mol. Biol.* 2029:257–271.

386 Grudt, T. J., Usowicz, M. M. and Henderson, G. 1996. Ca<sup>2+</sup> entry following store  
387 depletion in SH-SY5Y neuroblastoma cells. *Mol. Brain Res.* 36:93–100.

388 Grynkiewicz, G., Poenie, M. and Tsien, R. Y. 1985. A new generation of Ca<sup>2+</sup>  
389 indicators with greatly improved fluorescence properties. *J. Biol. Chem.*  
390 260:3440–3450.

391 Iwai, M., Michikawa, T., Bosanac, I., Ikura, M. and Mikoshiba, K. 2007. Molecular  
392 basis of the isoform-specific ligand-binding affinity of inositol 1, 4, 5-  
393 trisphosphate receptors. *J. Biol. Chem.* 282:12755–12764.

394 Kang, F., Zhou, M., Huang, X., Fan, J., Wei, L., Boulanger, J., Liu, Z., Salamero, J.,  
395 Liu, Y. and Chen, L. 2019. E-syt1 Re-arranges STIM1 clusters to stabilize ring-  
396 shaped ER-PM contact sites and accelerate Ca<sup>2+</sup> store replenishment. *Sci Rep.*  
397 9:1-11.

398 Knapp, M.L., Förderer, K., Alansary, D., Jung, M., Schwarz, Y., Lis, A. and Niemeyer,  
399 B.A. 2020. Alternative splicing switches STIM1 targeting to specialized  
400 membrane contact sites and modifies SOCE. *bioRxiv*. doi:  
401 10.1101/2020.03.25.005199. (Preprint posted January 1, 2020).

- 402 Knott, S.R., Maceli, A.R., Erard, N., Chang, K., Marran, K., Zhou, X., Gordon, A., El  
403 Demerdash, O., Wagenblast, E., Kim, S. and Fellmann, C. 2014. A  
404 computational algorithm to predict shRNA potency. *Mol. Cell.* 56:796-807.
- 405 Lewis, R. S. 2020. Store-operated calcium channels: From function to structure and  
406 back again. *Cold Spring Harb. Perspect. Biol.* 12: a035055.
- 407 Ma, H. T., Venkatachalam, K., Li, H. S., Montell, C., Kurosaki, T., Patterson, R. L., &  
408 Gill, D. L. 2001. Assessment of the role of the inositol 1,4,5-trisphosphate  
409 receptor in the activation of transient receptor potential channels and store-  
410 operated  $Ca^{2+}$  entry channels. *J Biol Chem*, 276: 18888–18896.
- 411 Ma, H. T., Venkatachalam, K., Parys, J. B., & Gill, D. L. 2002. Modification of store-  
412 operated channel coupling and inositol trisphosphate receptor function by 2-  
413 aminoethoxydiphenyl borate in DT40 lymphocytes. *J Biol Chem*, 277: 6915–  
414 6922.
- 415 Maléth, J., Choi, S., Muallem, S. and Ahuja, M. 2014. Translocation between PI(4,  
416 5)P<sub>2</sub>-poor and PI(4, 5)P<sub>2</sub>-rich microdomains during store depletion determines  
417 STIM1 conformation and Orai1 gating. *Nat Commun.* 5:1–10.
- 418 Mataragka, S. and Taylor, C. W. 2018. All three IP<sub>3</sub> receptor subtypes generate  $Ca^{2+}$   
419 puffs, the universal building blocks of IP<sub>3</sub>-evoked  $Ca^{2+}$  signals. *J Cell Sci.* 131:  
420 jcs220848.
- 421 Miotke, L., Lau, B. T., Rumma, R. T., & Ji, H. P. 2014. High sensitivity detection and  
422 quantitation of DNA copy number and single nucleotide variants with single color  
423 droplet digital PCR. *Anal. Chem.*, 86: 2618-2624.
- 424 Nunes-Hasler, P., Maschalidi, S., Lippens, C., Castelbou, C., Bouvet, S., Guido, D.,

- 425       Bermont, F., Bassoy, E.Y., Page, N., Merkler, D. and Hugues, S. 2017. STIM1  
426       promotes migration, phagosomal maturation and antigen cross-presentation in  
427       dendritic cells. *Nat Commun.* 8:1-15.
- 428       Okeke, E., Parker, T., Dingsdale, H., Concannon, M., Awais, M., Voronina, S., Molgó,  
429       J., Begg, M., Metcalf, D., Knight, A.E. and Sutton, R. 2016. Epithelial–  
430       mesenchymal transition, IP<sub>3</sub> receptors and ER–PM junctions: Translocation of  
431       Ca<sup>2+</sup> signalling complexes and regulation of migration. *Biochem. J.* 473:757–767.
- 432       Palty, R., Raveh, A., Kaminsky, I., Meller, R. and Reuveny, E. 2012. SARAF  
433       inactivates the store operated calcium entry machinery to prevent excess  
434       calcium refilling. *Cell.* 149:425-438.
- 435       Parekh, A. B. and Putney, J. W. 2005. Store-operated calcium channels. *Physiol. Rev.*  
436       85:757–810.
- 437       Parekh, A. B., Riley, A. M. and Potter, B. V. L. 2002. Adenophostin A and ribophostin,  
438       but not inositol 1,4,5-trisphosphate or manno-adenophostin, activate the Ca<sup>2+</sup>  
439       release-activated Ca<sup>2+</sup> current, ICRAC, in weak intracellular Ca<sup>2+</sup> buffer.  
440       *Biochem. J.* 361:133–141.
- 441       Patt, J., Alenfelder, J., Pfeil, E.M., Voss, J.H., Merten, N., Eryilmaz, F., Heycke, N.,  
442       Rick, U., Inoue, A., Kehraus, S. and Deupi, X. 2021. An experimental strategy to  
443       probe Gq contribution to signal transduction in living cells. *J. Biol. Chem.*  
444       296:100472.
- 445       Poteser, M., Leitinger, G., Pritz, E., Platzer, D., Frischauf, I., Romanin, C. and  
446       Groschner, K. 2016. Live-cell imaging of ER-PM contact architecture by a novel  
447       TIRFM approach reveals extension of junctions in response to store-operated

- 448  $\text{Ca}^{2+}$ -entry. *Sci. Rep.* 6:1-13.
- 449 Prakriya, M. and Lewis, R. S. 2001. Potentiation and inhibition of  $\text{Ca}^{2+}$  release-  
450 activated  $\text{Ca}^{2+}$  channels by 2-aminoethyldiphenyl borate (2-APB) occurs  
451 independently of  $\text{IP}_3$  receptors. *J Physiol.* 536:3–19.
- 452 Prakriya, M. and Lewis, R. S. 2015. Store-operated calcium channels pharmacology.  
453 *Physiol. Rev.* 307:1383–1436.
- 454 Prole, D. L. and Taylor, C. W. 2019. Structure and function of  $\text{IP}_3$  receptors. *Cold*  
455 *Spring Harb. Perspect. Biol.* 11: a035063.
- 456 Putney, J. W. 1986. A model for receptor-regulated calcium entry. *Cell Calcium.* 7:1–  
457 12.
- 458 Ran, F. A., Hsu, P. D., Wright, J., Agarwala, V., Scott, D. A., & Zhang, F. 2013.  
459 Genome engineering using the CRISPR-Cas9 system. *Nat. Protoc.* 8: 2281-  
460 2308.
- 461 Rana, A., Yen, M., Sadaghiani, A.M., Malmersjö, S., Park, C.Y., Dolmetsch, R.E. and  
462 Lewis, R.S. 2015. Alternative splicing converts STIM2 from an activator to an  
463 inhibitor of store-operated calcium channels. *J Cell Biol.* 209: 653-670.
- 464 Reinhardt, P., Glatza, M., Hemmer, K., Tsytsyura, Y., Thiel, C.S., Höing, S., Moritz, S.,  
465 Parga, J.A., Wagner, L., Bruder, J.M. and Wu, G. 2013. Derivation and  
466 expansion using only small molecules of human neural progenitors for  
467 neurodegenerative disease modeling. *PLoS One.* 8: e59252.
- 468 Rosado, J.A., Diez, R., Smani, T. and Jardín, I. 2016. STIM and Orai1 variants in  
469 store-operated calcium entry. *Front. Pharmacol.* 6:325.
- 470 Rosado, J. A., Jenner, S. and Sage, S. O. 2000. A role for the actin cytoskeleton in

471 the initiation and maintenance of store-mediated calcium entry in human  
472 platelets. Evidence for conformational coupling. *J Biol. Chem.* 275: 7527–7533.

473 Saleem, H., Tovey, S.C., Rahman, T., Riley, A.M., Potter, B.V. and Taylor, C.W. 2013.  
474 Stimulation of inositol 1, 4, 5-trisphosphate (IP<sub>3</sub>) receptor subtypes by analogues  
475 of IP<sub>3</sub>. *PLoS One.* 8:e54877.

476 Sampieri, A., Santoyo, K., Asanov, A. and Vaca, L. 2018. Association of the IP<sub>3</sub>R to  
477 STIM1 provides a reduced intraluminal calcium microenvironment, resulting in  
478 enhanced store-operated calcium entry. *Sci Rep.* 8:1–13.

479 Santoso, N. G., Cebotaru, L. and Guggino, W. B. 2011. Polycystin-1, 2, and STIM1  
480 interact with IP<sub>3</sub>R to modulate ER Ca<sup>2+</sup> release through the PI3K/Akt pathway.  
481 *Cell Physiol Biochem.* 27:715–726.

482 Srivats, S., Balasuriya, D., Pasche, M., Vistal, G., Edwardson, J.M., Taylor, C.W. and  
483 Murrell-Lagnado, R.D. 2016. Sigma-1 receptors inhibit store-operated Ca<sup>2+</sup> entry  
484 by attenuating coupling of STIM1 to Orai1. *J. Cell Biol.* 213: 65–79.

485 Sugawara, H., Kurosaki, M., Takata, M. and Kurosaki, T. 1997. Genetic evidence for  
486 involvement of type 1, type 2 and type 3 inositol 1, 4, 5-trisphosphate receptors  
487 in signal transduction through the B-cell antigen receptor. *EMBO J.* 16:3078–  
488 3088.

489 Thillaiappan, N.B., Chavda, A.P., Tovey, S.C., Prole, D.L. and Taylor, C.W. 2017.  
490 Ca<sup>2+</sup> signals initiate at immobile IP<sub>3</sub> receptors adjacent to ER-plasma membrane  
491 junctions. *Nat. Commun.* 8:1-16.

492 Thillaiappan, N.B., Chakraborty, P., Hasan, G. and Taylor, C.W. 2019. IP<sub>3</sub> receptors  
493 and Ca<sup>2+</sup> entry. *Biochim Biophys Acta Mol Cell Res.* 1866:1092–1100.

- 494 Tovey, S.C., De Smet, P., Lipp, P., Thomas, D., Young, K.W., Missiaen, L., De Smedt,  
495 H., Parys, J.B., Berridge, M.J., Thuring, J. and Holmes, A. 2001. Calcium puffs  
496 are generic InsP<sub>3</sub>-activated elementary calcium signals and are downregulated  
497 by prolonged hormonal stimulation to inhibit cellular calcium responses. *J. Cell*  
498 *Sci.* 114:3979-3989.
- 499 Venkiteswaran, G. and Hasan, G. 2009. Intracellular Ca<sup>2+</sup> signaling and store-  
500 operated Ca<sup>2+</sup> entry are required in *Drosophila* neurons for flight. *Proc. Natl.*  
501 *Acad. Sci. U. S. A.* 106:10326–10331.
- 502 Wojcikiewicz, R. J. H. 1995. Type I, II, and III inositol 1,4,5-trisphosphate receptors  
503 are unequally susceptible to down-regulation and are expressed in markedly  
504 different proportions in different cell types. *J. Biol. Chem.* 270:11678–11683.
- 505 Woo, J.S., Sun, Z., Srikanth, S. and Gwack, Y. 2020. The short isoform of extended  
506 synaptotagmin-2 controls Ca<sup>2+</sup> dynamics in T cells via interaction with STIM1.  
507 *Sci. Rep.* 10:1-13.
- 508 Woodard, G.E., López, J.J., Jardín, I., Salido, G.M. and Rosado, J.A. 2010. TRPC3  
509 regulates agonist-stimulated Ca<sup>2+</sup> mobilization by mediating the interaction  
510 between type I inositol 1, 4, 5-trisphosphate receptor, RACK1, and Orai1. *J. Biol.*  
511 *Chem.* 285: 8045–8053.
- 512 Yoshikawa, F., Morita, M., Monkawa, T., Michikawa, T., Furuichi, T. and Mikoshiba, K.  
513 1996. Mutational analysis of the ligand binding site of the inositol 1, 4, 5-  
514 trisphosphate receptor. *J. Biol. Chem.* 271:18277-18284.
- 515 Yue, L., Wang, L., Du, Y., Zhang, W., Hamada, K., Matsumoto, Y., Jin, X., Zhou, Y.,  
516 Mikoshiba, K., Gill, D.L. and Han, S. 2020. Type 3 inositol 1, 4, 5-trisphosphate

517 receptor is a crucial regulator of calcium dynamics mediated by endoplasmic  
518 reticulum in HEK cells. *Cells*. 9:275.



519 **Figure 1. Loss of IP<sub>3</sub>R1 Attenuates SOCE in Human Neural Stem Cells**

520 (A) Confocal images of hNPCs (passage 6) stained for DAPI and neural stem cell  
521 proteins: Pax6 and Ki67 (proliferation marker). Scale bars, 50 μm.

522 (B) WB for IP<sub>3</sub>R1 of hNPCs expressing non-silencing (NS) or IP<sub>3</sub>R1-shRNA.

523 (C) Summary results (mean ± s.d., *n* = 3) show IP<sub>3</sub>R1 expression relative to actin. \*\**P*  
524 < 0.01, Student's *t*-test with unequal variances.

525 (D) Changes in [Ca<sup>2+</sup>]<sub>c</sub> evoked by thapsigargin (Tg, 10 μM) in Ca<sup>2+</sup>-free HBSS and  
526 then restoration of extracellular Ca<sup>2+</sup> (2 mM) in hNPCs expressing NS or IP<sub>3</sub>R1-  
527 shRNA. Mean ± s.e.m. from 3 independent experiments, each with 4 replicates that  
528 together included 100-200 cells. Inset shows the target of Tg.

529 (E-G) Summary results (individual cells, median (bar), 25<sup>th</sup> and 75<sup>th</sup> percentiles (box)  
530 and mean (circle)) show Ca<sup>2+</sup> signals evoked by Tg or Ca<sup>2+</sup> restoration (E), rate of  
531 Ca<sup>2+</sup> entry (F) and resting [Ca<sup>2+</sup>]<sub>c</sub> (G). \*\*\**P* < 0.001, Mann-Whitney U-test.

532 (H) Changes in [Ca<sup>2+</sup>]<sub>c</sub> evoked by Tg (10 μM) in Ca<sup>2+</sup>-free HBSS and after restoring  
533 extracellular Ca<sup>2+</sup> (2 mM) in neurons (differentiated hNPCs) expressing NS or IP<sub>3</sub>R1-  
534 shRNA. Mean ± s.e.m. from 3 experiments with 100-200 cells.

535 (I,J) Summary results (presented as in E-G) show Ca<sup>2+</sup> signals evoked by Tg or Ca<sup>2+</sup>  
536 restoration (I) and rate of Ca<sup>2+</sup> entry (J). \*\*\**P* < 0.001. Mann-Whitney U-test.

537 See also **Figure S1**.

538

539 **Figure 2. Loss of IP<sub>3</sub>R1 Attenuates SOCE in SH-SY5Y Cells**

540 (A) WB for IP<sub>3</sub>R1-3 of SH-SY5Y cells expressing non-silencing (NS) or IP<sub>3</sub>R1-shRNA.

541 (B) Summary results (mean ± s.d., *n* = 4) show IP<sub>3</sub>R expression relative to actin

542 normalized to control NS cells. \*\* *P* < 0.01, Student's *t*-test with unequal variances.

543 (C) Ca<sup>2+</sup> signals evoked by carbachol (CCh, 3 μM) in SH-SY5Y cells expressing NS or

544 IP<sub>3</sub>R1-shRNA. Mean ± s.e.m. from 3 experiments with 100-200 cells.

545 (D) Summary results show peak changes in [Ca<sup>2+</sup>]<sub>c</sub> (Δ[Ca<sup>2+</sup>]<sub>c</sub>) evoked by CCh. \*\*\* *P* <

546 0.001, Mann-Whitney U-test.

547 (E) Ca<sup>2+</sup> signals evoked by thapsigargin (Tg, 10 μM) in Ca<sup>2+</sup>-free HBSS and then after

548 restoration of extracellular Ca<sup>2+</sup> (2 mM) in cells expressing NS or IP<sub>3</sub>R1-shRNA. Mean

549 ± s.e.m. from 3 experiments with 50-100 cells.

550 (F, G) Summary results (individual cells, mean ± s.e.m., *n* = 3, 50-100 cells) show

551 peak changes in [Ca<sup>2+</sup>]<sub>c</sub> evoked by Ca<sup>2+</sup> restoration (Δ[Ca<sup>2+</sup>]<sub>c</sub>) (F) and rate of Ca<sup>2+</sup>

552 entry (G). \*\*\* *P* < 0.001, Mann-Whitney U-test.

553 (H) Ca<sup>2+</sup> signals evoked by Tg and then Ca<sup>2+</sup> restoration in cells expressing NS-

554 shRNA, or IP<sub>3</sub>R1-shRNA alone or with IP<sub>3</sub>R1 or IP<sub>3</sub>R3. Traces show mean ± s.e.m.

555 (100-220 cells from 3 experiments).

556 (I, J) Summary results (mean ± s.e.m, 100-220 cells from 3 experiments) show peak

557 increases in [Ca<sup>2+</sup>]<sub>c</sub> (Δ[Ca<sup>2+</sup>]<sub>c</sub>) evoked by Ca<sup>2+</sup> restoration (I) and rates of Ca<sup>2+</sup> entry

558 (J) evoked by restoring extracellular Ca<sup>2+</sup>.

559 (K) Effects of thapsigargin (Tg, 10 μM) in Ca<sup>2+</sup>-free HBSS and then after Ca<sup>2+</sup>

560 restoration (2 mM) in cells expressing IP<sub>3</sub>R1-shRNA alone or with IP<sub>3</sub>R1 or mCh-

561 STIM1. Traces show mean ± s.e.m. (100-150 cells from 3 experiments).

562 (L, M) Summary results (mean  $\pm$  s.e.m.) show peak increase in  $[Ca^{2+}]_c$  after  $Ca^{2+}$   
563 restoration ( $\Delta[Ca^{2+}]_c$ ) (L) and rate of  $Ca^{2+}$  entry (M). Different letters indicate significant  
564 differences (panels I, J, L, M),  $P < 0.001$ , one-way ANOVA with pair-wise Tukey's test.

565 See also **Figures S2-S4**.

566

567

568

569 **Figure 3. Regulation of SOCE by IP<sub>3</sub>R Requires IP<sub>3</sub> Binding But Not a Functional**  
570 **Pore in SH-SY5Y cells**

571 (A) SOCE is activated when loss of Ca<sup>2+</sup> from the ER through IP<sub>3</sub>R activates STIM1

572 (i). Our results suggest an additional role for IP<sub>3</sub>R (ii).

573 (B) SH-SY5Y cells expressing IP<sub>3</sub>R1-shRNA alone or with IP<sub>3</sub>R1 or IP<sub>3</sub>R1<sup>DA</sup> were

574 stimulated with thapsigargin (Tg, 1 μM) in Ca<sup>2+</sup>-free HBSS before restoring

575 extracellular Ca<sup>2+</sup> (2 mM). Traces show mean ± s.e.m, for 100-150 cells from 3

576 experiments.

577 (C) Cells expressing IP<sub>3</sub>R1-shRNA and IP<sub>3</sub>R1<sup>DA</sup> were treated with NS-siRNA or Orai1-

578 siRNA before measuring Tg-evoked Ca<sup>2+</sup> entry. Traces show mean ± s.e.m. for 85-

579 100 cells from 3 experiments.

580 (D) Summary results (mean ± s.e.m.) show peak increases in [Ca<sup>2+</sup>]<sub>c</sub> (Δ[Ca<sup>2+</sup>]<sub>c</sub>)

581 evoked by Ca<sup>2+</sup> restoration.

582 (E) Tg-evoked Ca<sup>2+</sup> entry in cells expressing IP<sub>3</sub>R1-shRNA with IP<sub>3</sub>R1, IP<sub>3</sub>R1<sup>RQ</sup> or

583 IP<sub>3</sub>R1<sup>RQ/KQ</sup>. Traces show mean ± s.e.m, for 90-150 cells from 3 experiments.

584 (F) Summary results (mean ± s.e.m.) show peak increases in [Ca<sup>2+</sup>]<sub>c</sub> (Δ[Ca<sup>2+</sup>]<sub>c</sub>)

585 evoked by Ca<sup>2+</sup> restoration. Different letter codes (panels D, F) indicate significantly

586 different values, *P* < 0.001, one-way ANOVA and pair-wise Tukey's test.

587 See also **Figure S5**.

588

589 **Figure 4. Receptor-Regulated IP<sub>3</sub> Production Stimulates SOCE in Cells With**  
590 **Empty Ca<sup>2+</sup> Stores and Expressing Pore-Dead IP<sub>3</sub>R**

591 (A, B) SH-SY5Y cells expressing IP<sub>3</sub>R1-shRNA alone (A) or with IP<sub>3</sub>R1<sup>DA</sup> (B) were  
592 treated with a low concentration of CPA (2 μM) in Ca<sup>2+</sup>-free HBSS to partially deplete  
593 the ER of Ca<sup>2+</sup> and sub-maximally activate SOCE (see **Figures S5M and S5N**).

594 Carbachol (CCh, 1 μM) was then added to stimulate IP<sub>3</sub> formation through muscarinic  
595 receptors, and extracellular Ca<sup>2+</sup> (2 mM) was then restored. Traces (mean ± s.e.m of  
596 113-200 cells from 3 experiments) show responses with and without the CCh addition.

597 (C) Summary results show the peak increases in [Ca<sup>2+</sup>]<sub>c</sub> (Δ[Ca<sup>2+</sup>]<sub>c</sub>) after addition of  
598 CCh (CCh-induced Ca<sup>2+</sup> release) and then after restoring extracellular Ca<sup>2+</sup> (SOCE).

599 (D-F) SH-SY5Y cells wild type (WT) (D) and expressing NS-shRNA (E) or IP<sub>3</sub>R1-  
600 shRNA (F) were treated with YM-254890 (YM, 1 μM, 5 min) in Ca<sup>2+</sup>-free HBSS to  
601 inhibit Gαq and then with thapsigargin (Tg, 1 μM) before restoring extracellular Ca<sup>2+</sup> (2  
602 mM). Traces show mean ± s.e.m of 80 -100 cells from 3 experiments. .

603 (G-I) Similar analyses of HEK 293T cells. Summary results (mean ± s.e.m, 50-100  
604 cells from 3 experiments) are shown in (I).

605 Different letter codes (panels C and I) indicate significantly different values within the  
606 store Ca<sup>2+</sup> release or SOCE groups, *P* < 0.001, one-way ANOVA and pair-wise  
607 Tukey's test.

608 See also **Figure S6**.

609

610

611

612 **Figure 5. IP<sub>3</sub>Rs Promote Interaction of STIM1 With Orai1**

613 (A-E) PLA analyses of interactions between STIM1 and Orai1 in SH-SY5Y cells  
614 expressing NS-shRNA (A) or IP<sub>3</sub>R1-shRNA alone (B) or with IP<sub>3</sub>R1 (C), IP<sub>3</sub>R1<sup>DA</sup> (D) or  
615 IP<sub>3</sub>R1<sup>RQ/KQ</sup> (E). Confocal images are shown for control cells or after treatment with  
616 thapsigargin (Tg, 1 μM) in Ca<sup>2+</sup>-free HBSS. PLA reaction product is red, and nuclei  
617 are stained with DAPI (blue). Scale bars, 5 μm. Summary results show the surface  
618 area of the PLA spots for 8-10 cells from 2 independent analyses. Individual values,  
619 median (bar) and 25<sup>th</sup> and 75<sup>th</sup> percentiles (box). \*\*\* *P* < 0.001, Student's *t*-test with  
620 unequal variances.

621 See also **Figure S7**.

622

623

624 **Figure 6. Extended Synaptotagmins Rescue SOCE in Cells Lacking IP<sub>3</sub>R1**

625 (A) SH-SY5Y cells expressing IP<sub>3</sub>R1-shRNA alone or with E-Syt1 were stimulated with  
626 Tg (1 μM) in Ca<sup>2+</sup>-free HBSS before restoring extracellular Ca<sup>2+</sup> (2 mM). Traces show  
627 mean ± s.e.m, for 50-80 cells from 3 experiments.

628 (B) Summary results show Δ[Ca<sup>2+</sup>]<sub>c</sub> evoked by restoring Ca<sup>2+</sup> (SOCE). Mean ± s.e.m,  
629 \*\*\* *P* < 0.001, Mann-Whitney U- test.

630 (C) Summary results (mean ± s.e.m, n = 50-80 cells) show resting [Ca<sup>2+</sup>]<sub>c</sub> (left) and  
631 the peak Ca<sup>2+</sup> signals (Δ[Ca<sup>2+</sup>]<sub>c</sub>) evoked by thapsigargin (Tg, 1 μM) in Ca<sup>2+</sup>-free HBSS  
632 for SH-SY5Y cells expressing IP<sub>3</sub>R1-shRNA alone or with human E-Syt1.

633 (D) Cells over-expressing E-Syt1 and treated with IP<sub>3</sub>R1-shRNA in combination with  
634 either NS or STIM1 siRNA were stimulated with Tg (1 μM) in Ca<sup>2+</sup>-free HBSS before  
635 restoration of extracellular Ca<sup>2+</sup> (2 mM). Mean ± s.e.m. from 3 experiments with 30-50  
636 cells.

637 (E, F) Summary results (mean ± s.e.m, n = 30-50 cells) show SOCE evoked by Tg

638 (E), resting [Ca<sup>2+</sup>]<sub>c</sub> and the Tg-evoked Ca<sup>2+</sup> release from intracellular stores (F). \*\*\* *P* <  
639 0.001, one-way ANOVA with pair-wise Tukey's test.

640 (G) Similar analyses of cells expressing NS shRNA alone or with human E-Syt1 and  
641 then treated with Tg (1 μM) in Ca<sup>2+</sup>-free HBSS before restoring extracellular Ca<sup>2+</sup> (2  
642 mM). Mean ± s.e.m. from 3 experiments with 75-110 cells.

643 (H, I) Summary results (mean ± s.e.m, n = 75-110) show resting [Ca<sup>2+</sup>]<sub>c</sub> (H) and  
644 Δ[Ca<sup>2+</sup>]<sub>c</sub> evoked by Tg (store release) or Ca<sup>2+</sup> restoration (SOCE) (I). No significant  
645 difference, one-way ANOVA with pair-wise Tukey's test.

646

647 **Figure 7. Dual Regulation of SOCE by IP<sub>3</sub>Rs**

648 (A) SOCE is activated when loss of Ca<sup>2+</sup> from the ER, usually mediated by opening of  
649 IP<sub>3</sub>Rs when they bind IP<sub>3</sub>, causes STIM to unfurl cytosolic domains (2). The exposed  
650 cytosolic domains of STIM1 reach across a narrow gap between the ER and PM at a  
651 MCS to interact with PIP<sub>2</sub> and Orai1 in the PM. Binding of STIM1 to Orai1 causes pore  
652 opening, and SOCE then occurs through the open Orai1 channel. We show that IP<sub>3</sub>Rs  
653 when they bind IP<sub>3</sub> also facilitate interactions between Orai1 and STIM, perhaps by  
654 stabilizing the MCS (1). Receptors that stimulate IP<sub>3</sub> formation thereby promote both  
655 activation of STIM (by emptying Ca<sup>2+</sup> stores) and independently promote interaction of  
656 active STIM1 with Orai1.

657 (B) Other mechanisms, including ryanodine receptors (RyR), can also release Ca<sup>2+</sup>  
658 from the ER. We suggest that convergent regulation of SOCE by IP<sub>3</sub>R with bound IP<sub>3</sub>  
659 allows receptors that stimulate IP<sub>3</sub> formation to selectively control SOCE.

660



661 **STAR METHODS**

662

663 **RESOURCE AVAILABILITY**

664 **Lead Contact**

665 All requests for resources and reagents should be directed to the lead contact, Dr.

666 Gaiti Hasan ([gaiti@ncbs.res.in](mailto:gaiti@ncbs.res.in)).

667

668 **Materials Availability**

669 Constructs and cell lines are available upon request. MTA required for cell lines.

670

671 **Data and Code Availability**

672 This study did not generate any computer code. The data supporting the findings of

673 this study are available within the manuscript. All other data supporting the findings of

674 this study are available from the corresponding author on reasonable request.

675

676 **METHOD DETAILS**

677 **Culture of Human Neural Precursor Cells**

678 Human neural precursor cells (hNPCs) were derived from a human embryonic stem

679 cell (hESC) line, H9/WA09, using a protocol that inhibits dual SMAD signaling and

680 stimulates Wnt signaling (Reinhardt *et al.*, 2013) as described previously

681 (Gopurappilly *et al.*, 2018, 2019). hNPCs were grown as adherent dispersed cells on

682 growth factor-reduced Matrigel (0.5%) in hNPC maintenance medium (NMM) at 37°C

683 in humidified air with 5% CO<sub>2</sub>. NMM comprised a 1:1 mixture of DMEM/F-12 and

684 Neurobasal medium, supplemented with GlutaMAX (0.5x), N2 supplement (1:200),  
685 B27 without vitamin A (1:100), Antibiotic-Antimycotic, CHIR99021 (3  $\mu$ M),  
686 purmorphamine (0.5 mM) and ascorbic acid (150  $\mu$ M). Doubling time was ~24 hr.  
687 Cells were passaged every 4-5 days by treatment with StemPro accutase, stored in  
688 liquid nitrogen, and thawed as required. Cells were confirmed to be mycoplasma-free  
689 by monthly screening (MycoAlert). hNPCs between passages 16-19 were used.  
690 All experiments performed with hESC lines were approved by the Institutional  
691 Committee for Stem Cell Research, registered under the National Apex Committee for  
692 Stem Cell Research and Therapy, Indian Council of Medical Research, Ministry of  
693 Health, New Delhi.

694

### 695 **Stable Knockdown of IP<sub>3</sub>R1**

696 An UltramiR lentiviral inducible shRNA-mir based on the shERWOOD algorithm  
697 (Auyeung *et al.*, 2013; Knott *et al.*, 2014) was used to inhibit IP<sub>3</sub>R1 expression. The  
698 all-in-one pZIP vector, which allows puromycin-selection and doxycycline-induced  
699 expression of both shRNA-mir and Zs-Green for visualization, was from TransOMIC  
700 Technologies. Lentiviral pZIP transfer vectors encoding non-silencing shRNA (NS) or  
701 IP<sub>3</sub>R1-targeting shRNA were packaged as lentiviral particles using packaging (pCMV-  
702 dR8.2 dpvr) and envelope vectors (pCMV-VSV-G) by transfection of HEK 293T cells.  
703 Viral particles were collected and processed, and hNPCs (passage 9) or SH-SY5Y  
704 cells were transduced (multiplicity of infection, MOI = 10) using Lipofectamine LTX  
705 with PLUS reagent. Cells were maintained in media containing doxycycline (2  $\mu$ g/ml)  
706 to induce shRNA expression, and puromycin to select transduced cells (1  $\mu$ g/ml for

707 hNPCs; 3 µg/ml for SH-SY5Y and HEK 293T cells). Cells were passaged 4-5 times  
708 after lentiviral transduction to select for stable expression of shRNAs.

709

### 710 **Derivation of Neurons From hNPCs**

711 Neurons were differentiated from hNPCs stably transduced with shRNA. hNPCs were  
712 seeded at 50-60% confluence in NMM on coverslips coated with poly-D-lysine (0.2  
713 mg/ml). After 1-2 days, the medium was replaced with neuronal differentiation  
714 medium, which comprised a 1:1 mixture of DMEM/F-12 with Neurobasal  
715 supplemented with B27 (1:100), N2 (1:200), GlutaMAX (0.5x) and Antibiotic-  
716 Antimycotic solution. Medium was replaced on alternate days. Neurons were used  
717 after 15-20 days.

718

### 719 **Culture and Transfection of SH-SY5Y Cells**

720 SH-SY5Y cells were grown on culture dishes in DMEM/F-12 with 10% foetal bovine  
721 serum at 37 °C in humidified air with 5% CO<sub>2</sub>. Cells were passaged every 3-4 days  
722 using TrypLE Express and confirmed to be free of mycoplasma. Cells expressing  
723 shRNA were transiently transfected using TransIT-LT1 transfection reagent in Opti-  
724 MEM. Plasmids (250 ng) and/or siRNA (200 ng) in transfection reagent (1 µg/2.5 µl)  
725 were added to cells grown to 50% confluence on glass coverslips attached to an  
726 imaging dish. Cells were used after 48 hr. The siRNAs used (100 nM) were to human  
727 Orai1 or non-silencing (NS), to human STIM1 or NS. The expression plasmids are  
728 described in Key Resources.

729

## 730 **CRISPR/Cas9n Editing of SH-SY5Y Cells**

731 To allow CRISPR/Cas9n-mediated disruption of IP<sub>3</sub>R expression, we used a  
732 published method to clone gRNAs into the backbone vector (pX459) (Ran *et al.*,  
733 2013). Forward and reverse gRNA oligonucleotides (100 μM) were annealed and  
734 ligated using T4 DNA ligase by incubation (10 μl, 37°C, 30 min) before slow cooling to  
735 20°C. Plasmids encoding Cas9n were digested with *BbsI-HF* (37°C, 12 hr), gel-  
736 purified (NucleoSpin Gel and PCR Clean-up kit) and the purified fragment was stored  
737 at -20°C. A mixture (final volume 20 μl) of gRNA duplex (1 μl, 0.5 μM), digested pX459  
738 vector (30 ng), 10× T4 DNA ligase buffer (2 μl) and T4 DNA ligase (1 μl) was  
739 incubated (20°C, 1 hr). After transformation of DH5-α competent *E. coli* with the  
740 ligation mixture, plasmids encoding Cas9n and the sgRNAs were extracted, and the  
741 coding sequences were confirmed (Ran *et al.*, 2013). The plasmid (2 μg) was then  
742 transfected into SH-SY5Y cells (50-60% confluent) in a 6-well plate using TransIT LT-  
743 1 reagent. After 48 hr, puromycin (2.5 μg/ml, 72 hr) was added to kill non-transfected  
744 cells. Colonies were then propagated and screened for the Ca<sup>2+</sup> signals evoked by  
745 carbachol and for the presence of the IP<sub>3</sub>R gene by genomic DNA PCR and droplet  
746 digital PCR using primers close to the region targeted by the gRNAs (as described in  
747 Miotke *et al.*, 2014). Three independently derived lines, each with one residual IP<sub>3</sub>R1  
748 gene, were used for analyses of Ca<sup>2+</sup> signaling (see **Figure S2I**). For one of the cell  
749 lines (IKO 2), disruption of one copy of the IP<sub>3</sub>R1 gene was confirmed by genomic  
750 PCR, droplet digital PCR and Western blotting (**Figures S2F and S2G**).

751

752

## 753 **Ca<sup>2+</sup> Imaging**

754 Methods for single-cell Ca<sup>2+</sup> imaging were described previously (Gopurappilly *et al.*,  
755 2019). Briefly, cells grown as a monolayer (~70% confluence) on homemade  
756 coverslip-bottomed dishes were washed and loaded with Fura 2 by incubation with  
757 Fura 2 AM (4 μM, 45 min, 37°C), washed and imaged at room temperature in HEPES-  
758 buffered saline solution (HBSS). HBSS comprised: 20 mM HEPES, 137 mM NaCl, 5  
759 mM KCl, 2 mM MgCl<sub>2</sub>, 2 mM CaCl<sub>2</sub>, 10 mM glucose, pH 7.3. CaCl<sub>2</sub> was omitted from  
760 Ca<sup>2+</sup>-free HBSS. Treatments with carbamoylcholine chloride (Carbachol, CCh),  
761 thapsigargin (Tg), cyclopiazonic acid (CPA), YM-254890 or high-K<sup>+</sup> HBSS (HBSS  
762 supplemented with 75 mM KCl) are described in legends.

763 Responses were recorded at 2-s intervals using an Olympus IX81-ZDC2 Focus  
764 Drift-Compensating Inverted Microscope with 60x oil immersion objective (numerical  
765 aperture, NA = 1.35) with excitation at 340 nm and 380 nm. Emitted light (505 nm)  
766 was collected with an Andor iXON 897E EMCCD camera and AndoriQ 2.4.2 imaging  
767 software. Maximal (R<sub>max</sub>) and minimal (R<sub>min</sub>) fluorescence ratios were determined by  
768 addition of ionomycin (10 μM) in HBSS containing 10 mM CaCl<sub>2</sub> or by addition of  
769 Ca<sup>2+</sup>-free HBSS containing BAPTA (10 mM) and Triton X100 (0.1%). Background-  
770 corrected fluorescence recorded from regions of interest (ROI) drawn to include an  
771 entire cell was used to determine mean fluorescence ratios ( $R = F_{340}/F_{380}$ ) (ImageJ),  
772 and calibrated to [Ca<sup>2+</sup>]<sub>c</sub> from (Grynkiewicz, Poenie and Tsien, 1985):

$$773 \quad [Ca^{2+}]_c = K_D \cdot \frac{F_{380}^{min}}{F_{380}^{max}} \cdot \frac{(R - R_{min})}{(R_{max} - R)}$$

774 where, K<sub>D</sub> = 225 nM (Forostyak *et al.*, 2013).

775

## 776 **Western Blots**

777 Proteins were isolated in RIPA buffer with protease inhibitor cocktail or, for WB of  
778 Orai1, in medium containing 150 mM NaCl, 50 mM Tris, 1% Triton-X-100, 0.1% SDS  
779 and protease inhibitor cocktail. After 30 min on ice with intermittent shaking, samples  
780 were collected by centrifugation (11,000  $\times$ g, 20 min) and their protein content was  
781 determined (BCA protein assay kit). Proteins (~30  $\mu$ g/lane) were separated on 8%  
782 SDS-PAGE gels for IP<sub>3</sub>R or 10% SDS-PAGE gels for STIM1 and Orai1, and  
783 transferred to a Protran 0.45- $\mu$ m nitrocellulose membrane using a TransBlot semi-dry  
784 transfer system. Membranes were blocked by incubation (1 hr, 20°C) in TBST  
785 containing skimmed milk or BSA (5%). TBST (Tris-buffered saline with Tween)  
786 comprised: 137 mM NaCl, 20 mM Tris, 0.1% Tween-20, pH 7.5. Membranes were  
787 incubated with primary antibody in TBST (16 hr, 4°C), washed with TBST (3  $\times$  10 min),  
788 and incubated (1 hr, 20°C) in TBST containing HRP-conjugated secondary antibody.  
789 After 3 washes, HRP was detected using ECL Western blotting substrate and  
790 quantified using ImageQuant LAS 4000 and Image J. The primary antibodies used  
791 and their dilutions are listed in Key Resources.

792

## 793 **Immunocytochemistry**

794 After appropriate treatments, cells on a coverslip-bottomed plate were washed twice  
795 with cold PBS, fixed in PBS with paraformaldehyde (4%, 20°C, 20 min), washed (3  $\times$  5  
796 min) with PBS containing Triton-X100 (0.1%, PBST) and blocked by incubation (1 hr,  
797 20°C) in PBST containing goat serum (5%). After incubation with primary antibody in

798 PBST (16 hr, 4°C) and washing with PBST (3 × 5 min), cells were incubated (1 hr,  
799 20°C) with secondary antibody in PBST containing goat serum, washed (3 × 5 min),  
800 stained with DAPI (1 µg/ml in PBS, 10 min, 20°C) and washed (5 min, PBST). Cells  
801 were then covered with glycerol (60% v/v) and imaged using an Olympus FV300  
802 confocal laser scanning microscope with 20× or 60× oil-immersion objectives.  
803 Fluorescence was analyzed using ImageJ. The primary antibodies used and their  
804 dilutions are provided in Key Resources.

805

### 806 **Proximity Ligation Assay**

807 The Duolink *In Situ* Red Starter Mouse/Rabbit kit was used according to the  
808 manufacturer's protocol with primary antibodies to Orai1 (mouse 1:500) and STIM1  
809 (rabbit 1:1000). Cells (~30% confluent) were treated with thapsigargin (1 µM, 5 min) in  
810 Ca<sup>2+</sup>-free HBSS before fixation, permeabilization, and incubation with primary  
811 antibodies (16 hr, 4°C) and the PLA reactants. Red fluorescent PLA signals were  
812 imaged using an Olympus FV300 confocal laser scanning microscope, with excitation  
813 at 561 nm, and a 60× oil-immersion objective. Quantitative analysis of the intensity  
814 and surface area of PLA spots used the "Analyze particle" plugin of Fiji. Results are  
815 shown for 8-10 cells from two biological replicates of each genotype.

816

### 817 **Statistical Analyses**

818 All experiments were performed without blinding or prior power analyses. Independent  
819 biological replicates are reported as the number of experiments (n), with the number  
820 of cells contributing to each experiment indicated in legends. The limited availability of

821 materials for PLA restricted the number of independent replicates (n) to 2 (each with  
822 8-10 cells). Most plots show means  $\pm$  s.e.m. (or s.d.). Box plots show 25<sup>th</sup> and 75<sup>th</sup>  
823 percentiles, median and mean (see legends). Where parametric analyses were  
824 justified by a Normality test, we used Student's *t*-test with unequal variances for 2-way  
825 comparisons and ANOVA followed by pair-wise Tukey's test for multiple comparisons.  
826 Non-parametric analyses used the Mann-Whitney U-test. Statistical significance is  
827 shown by \*\*\*  $P < 0.001$ , \*\*  $P < 0.01$ , \*  $P < 0.05$ , or by letter codes wherein different letters  
828 indicate significantly different values ( $P < 0.001$ , details in legends). All analyses used  
829 Origin 8.5 software.

830

831

832

833

834

835

836

837

838

839

840

841

842

843



## Figure 1. Loss of IP<sub>3</sub>R1 Attenuates SOCE in Human Neural Stem Cells

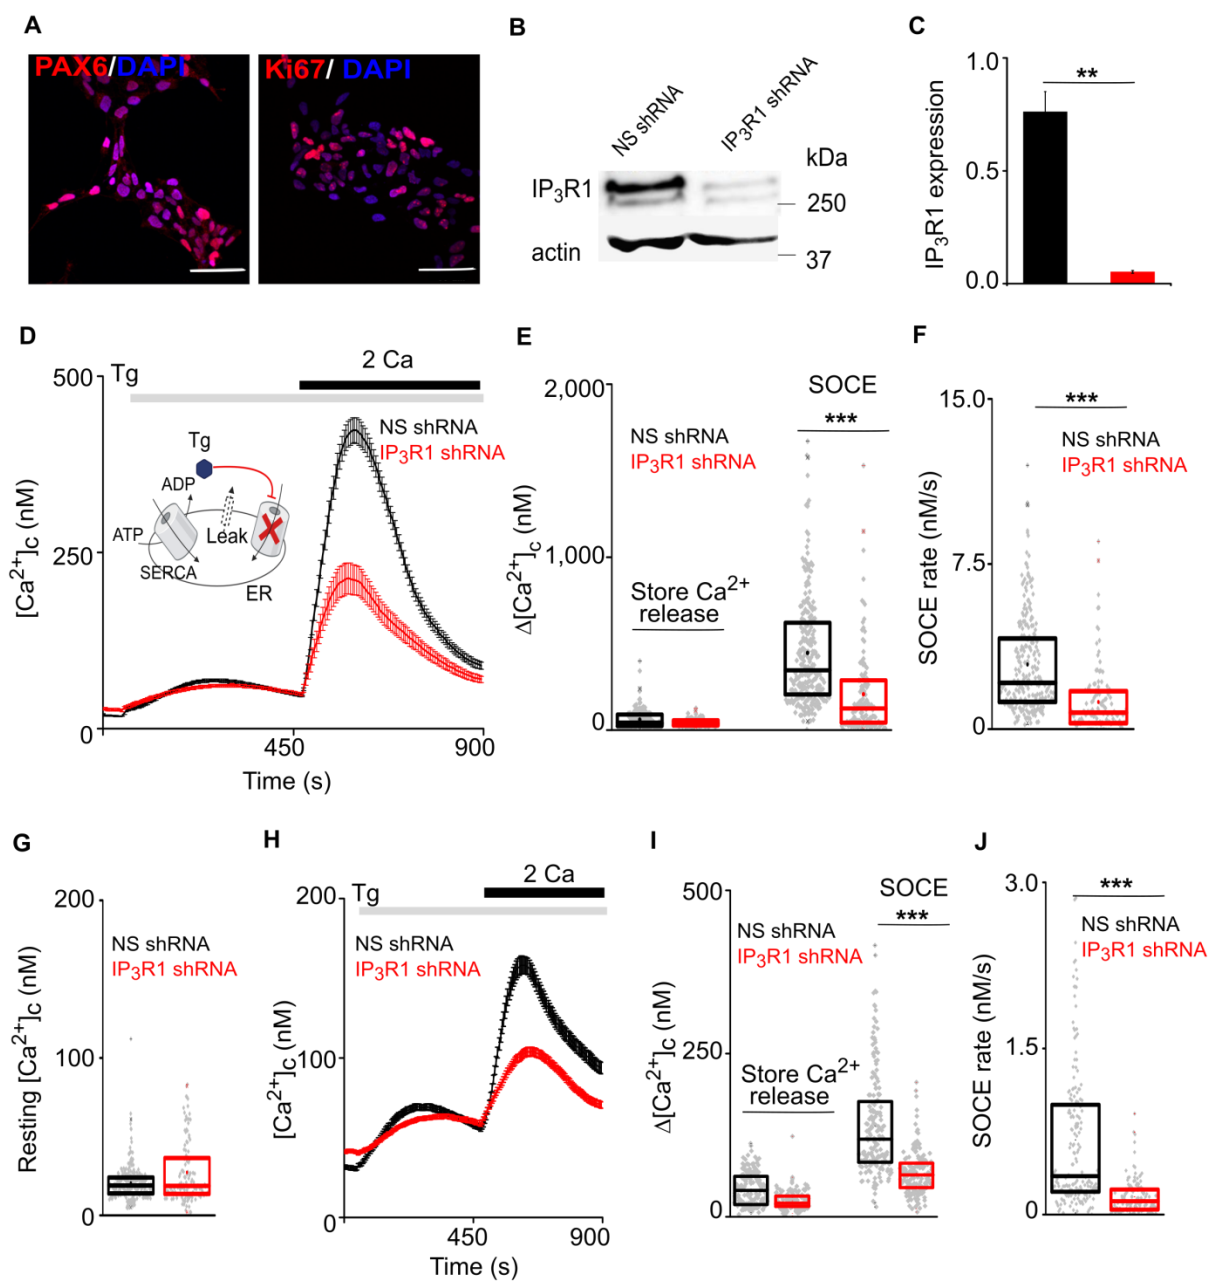

## Figure 2. Loss of IP<sub>3</sub>R1 Attenuates SOCE in SH-SY5Y Cells

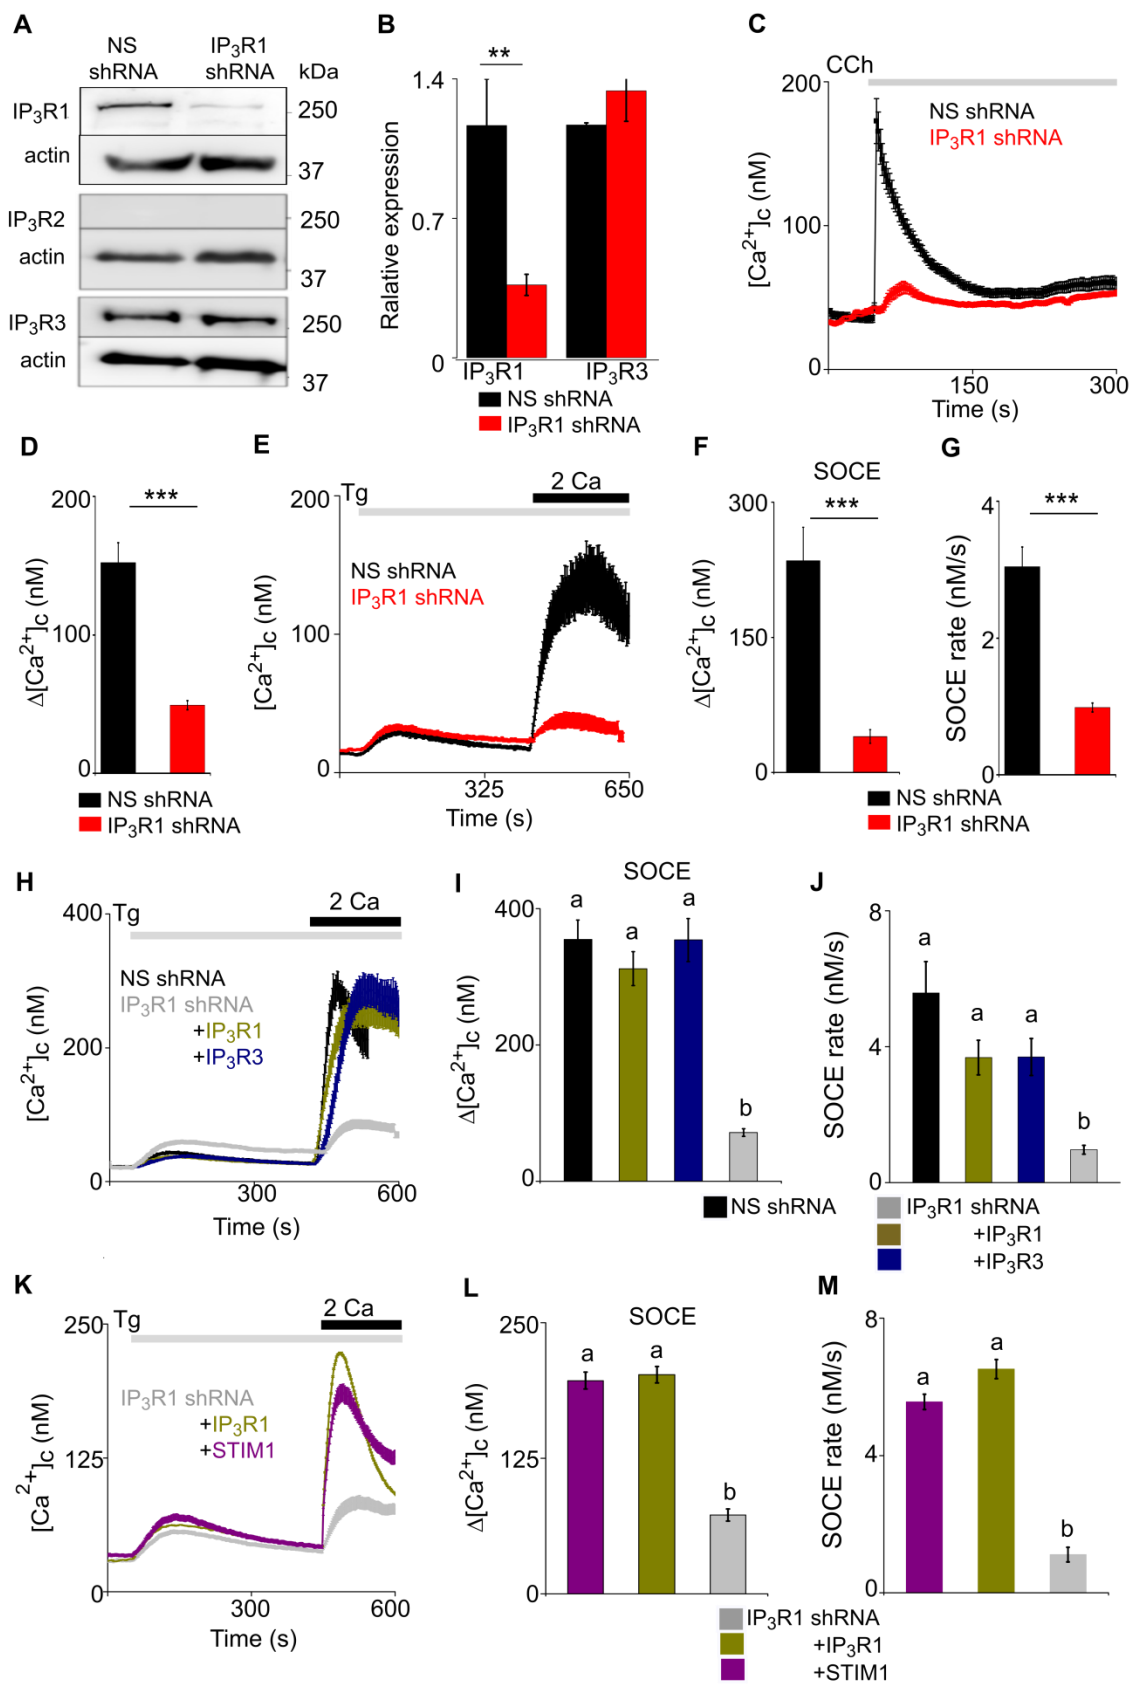

### Figure 3. Regulation of SOCE by IP<sub>3</sub>R Requires IP<sub>3</sub> Binding But Not a Functional Pore in SH-SY5Y cells

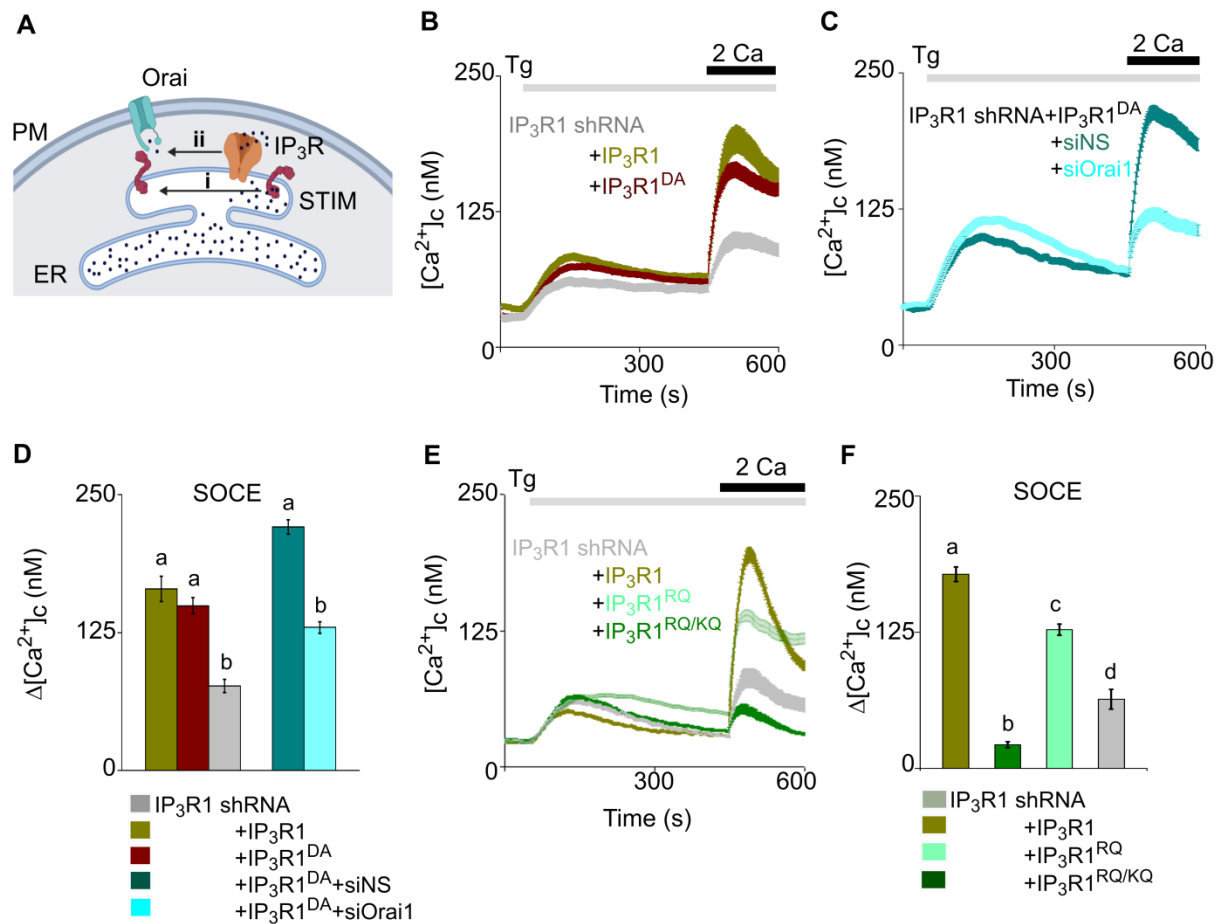

**Figure 4. Receptor-Regulated IP<sub>3</sub> Production Stimulates SOCE in Cells with Empty Ca<sup>2+</sup> Stores and Expressing Pore-Dead IP<sub>3</sub>R**

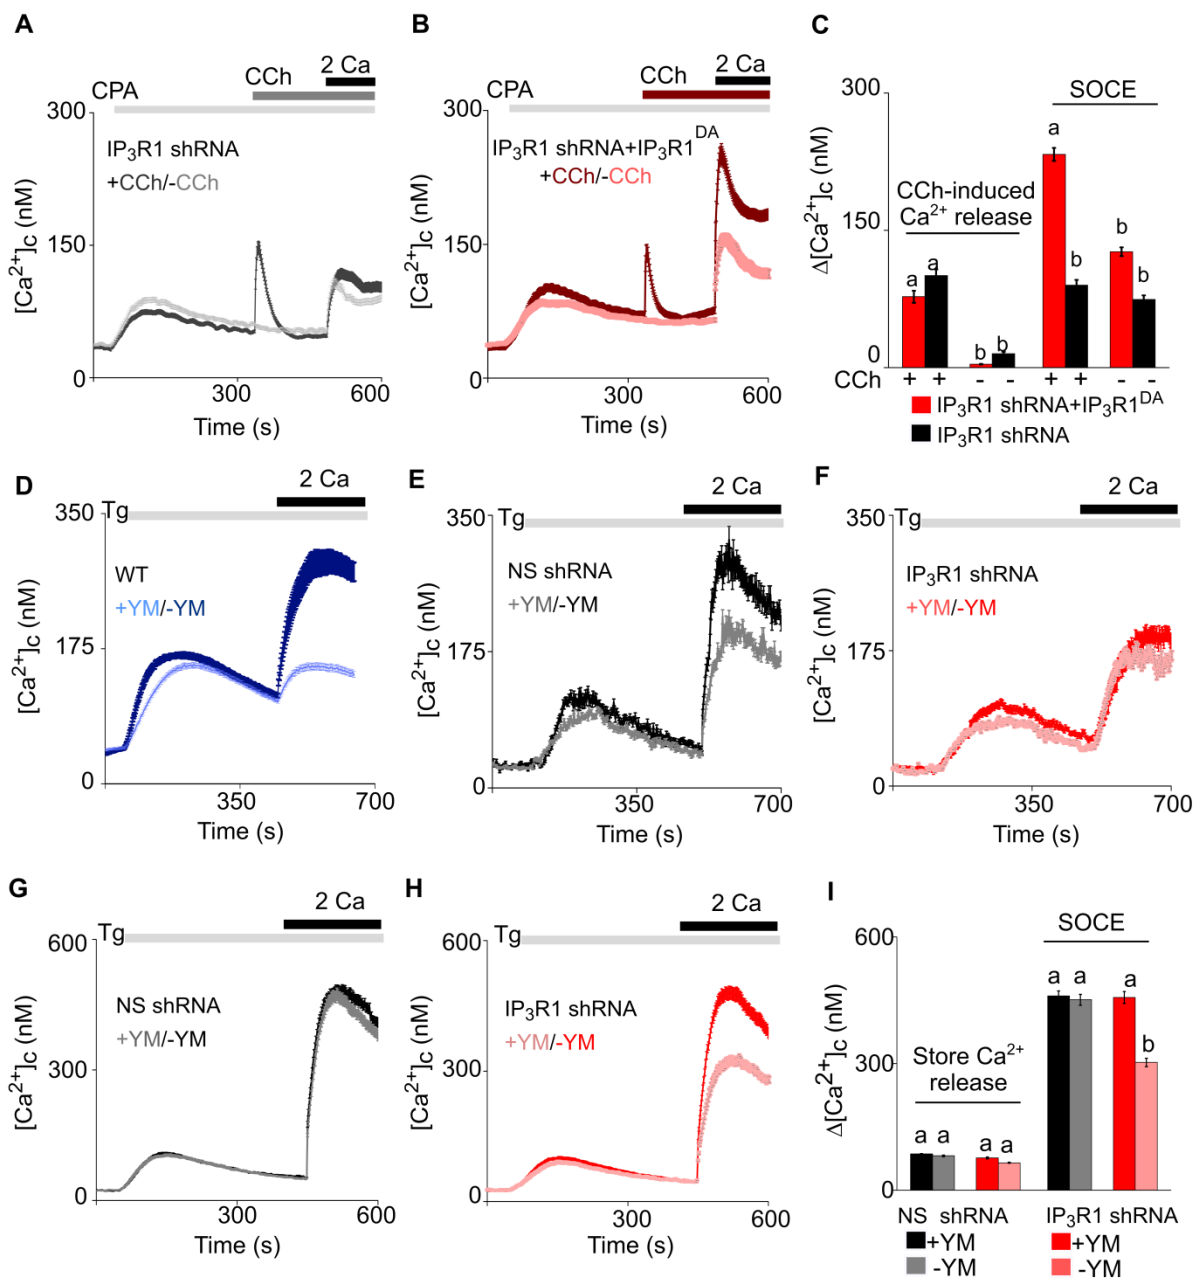

**Figure 5. IP<sub>3</sub>Rs Promote Interaction of STIM1 With Orai1**

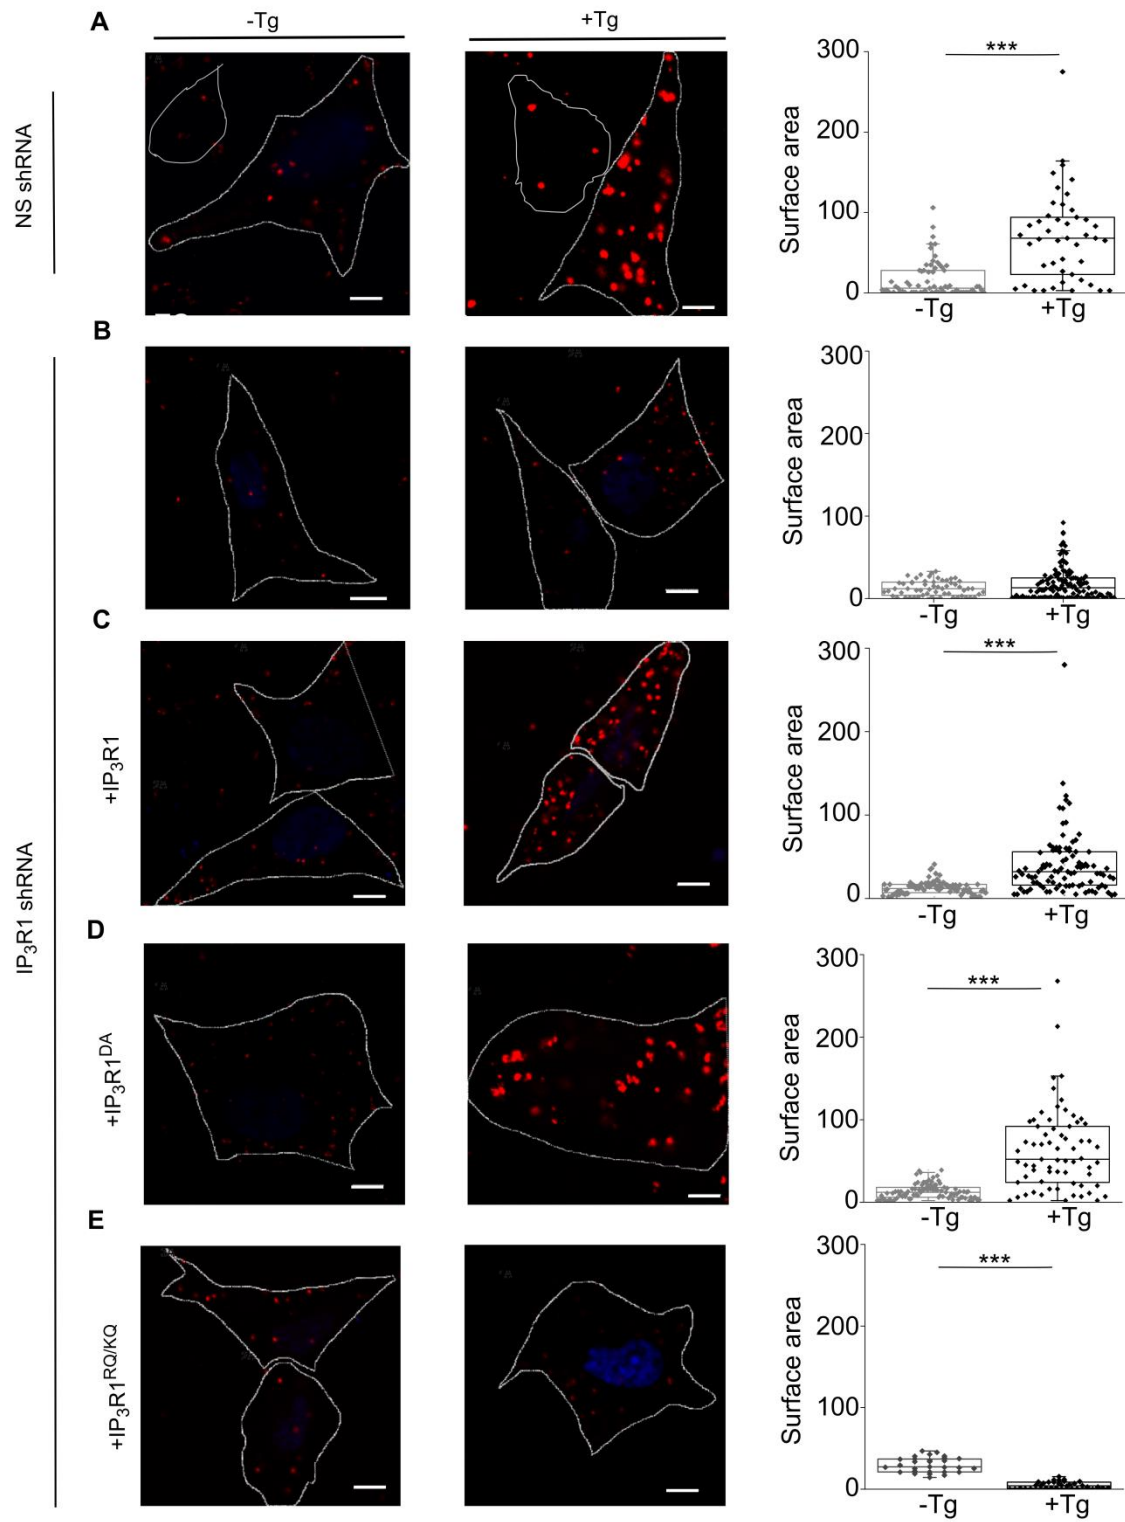

**Figure 6. Extended Synaptotagmins Rescue SOCE in Cells Lacking IP<sub>3</sub>R1**

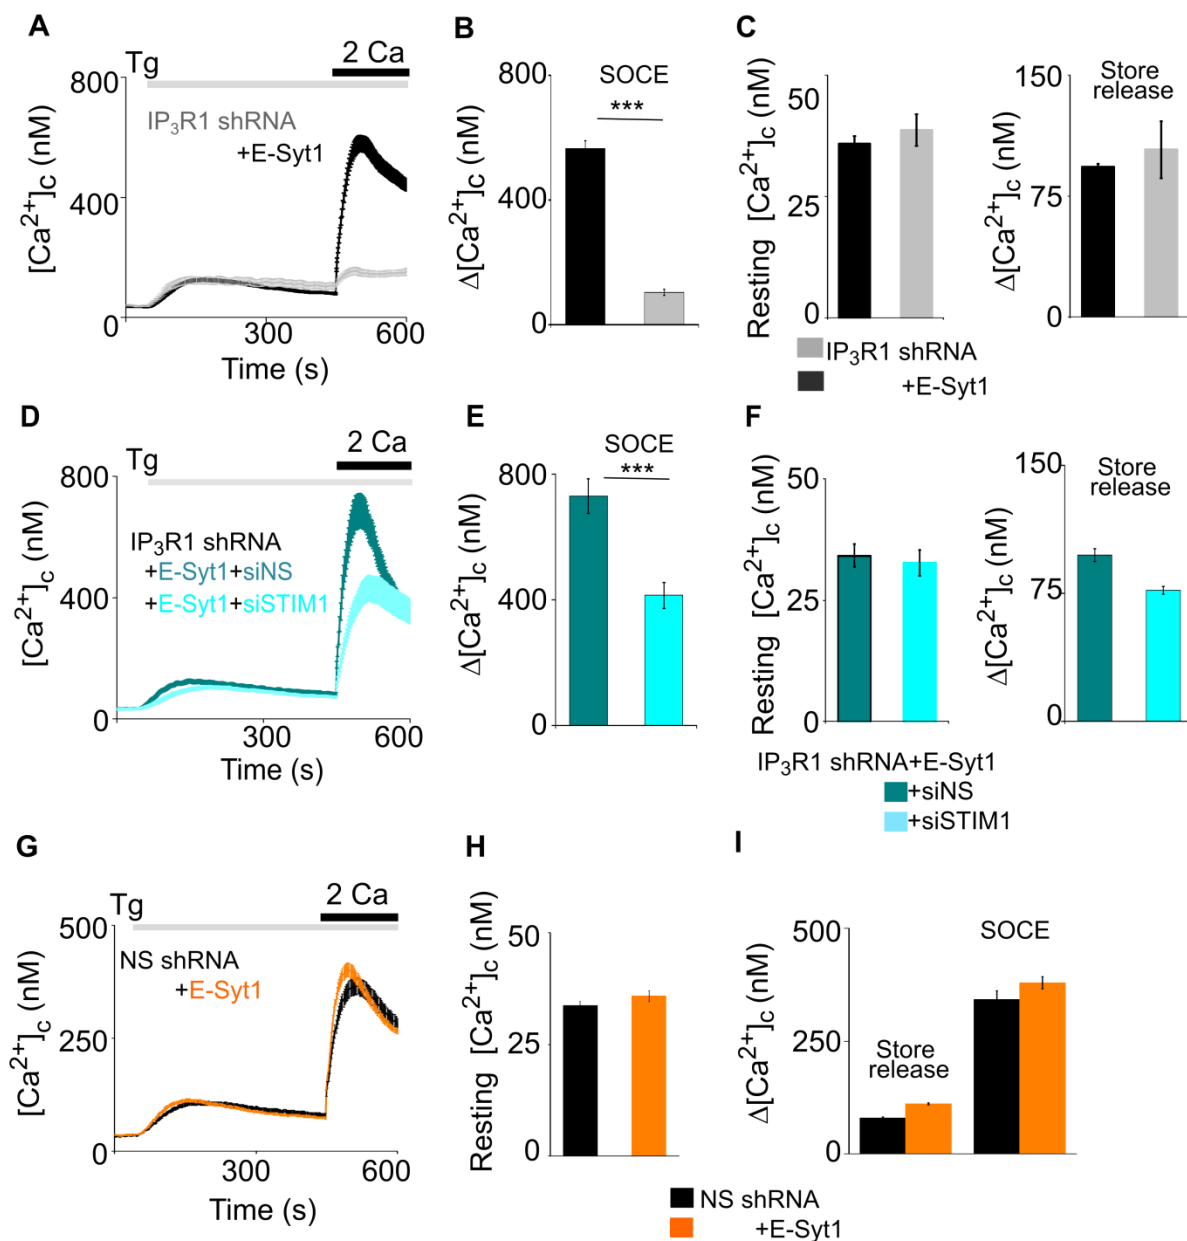

## Figure 7. Dual Regulation of SOCE by IP<sub>3</sub>Rs

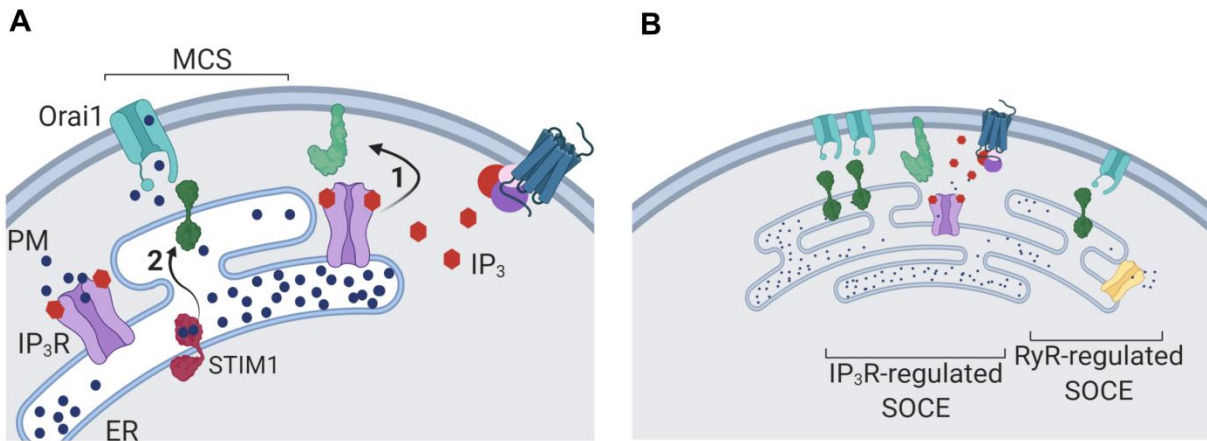

Source: https://biorxiv.org/content/10.1101/2022.04.12.488111v1.full.pdf
